# Supplementary material for: Triterpenoids from the Leaves of Diospyros digyna and Their PTP1B Inhibitory Activity
Source: MDPI journal article supplement (doi:10.3390/molecules29071640), 2024-04-05
Supplement: s1 [file s1]

## Supplementary Materials

# Triterpenoids from the leaves of *Diospyros digyna* and their PTP1B inhibitory activity

Lan Huang <sup>1,2,†</sup>, Ziqi Wang <sup>1,2,3,†</sup>, Fangxin Wang <sup>1,2</sup>, Song Wang <sup>1,2</sup>, Dezhi Wang <sup>1,2</sup>,  
Meihua Gao <sup>3</sup>, Hua Li <sup>3</sup>, Min Song <sup>1,2</sup> and Xiaoqi Zhang <sup>1,2,\*</sup>

<sup>1</sup> Guangdong Provincial Engineering Research Center for Modernization of TCM, Jinan University, Guangzhou 510632, P. R. China; huanglan@stu2021.jnu.edu.cn (L.H.); wangziqi@stu2021.jnu.edu.cn (Z.W.); wfxwfx@stu2022.jnu.edu.cn (F.W.); wangsong@stu2022.jnu.edu.cn (S.W.); dezhiwoo125@stu2020.jnu.edu.cn (D.W.); songm1017@jnu.edu.cn (M.S.)

<sup>2</sup> NMPA Key Laboratory for Quality Evaluation of TCM, Jinan University, Guangzhou 510632, P. R. China

<sup>3</sup> Guangdong Institute for Drug Control, Guangzhou 510663, P. R. China; gaomeihua@gdidc.org.cn (M.G.); bgs@gdidc.org.cn (H.L.)

\* Correspondence: tzhxq01@jnu.edu.cn

† These authors contributed equally to this work.

## Content

|                                                                                                                  |    |
|------------------------------------------------------------------------------------------------------------------|----|
| <b>Figure S1.</b> $^1\text{H}$ NMR spectrum of <b>1</b> (400 MHz, $\text{CD}_3\text{OD}$ ) .....                 | 4  |
| <b>Figure S2.</b> $^{13}\text{C}$ NMR spectrum of <b>1</b> (100 MHz, $\text{CD}_3\text{OD}$ ) .....              | 4  |
| <b>Figure S3.</b> HSQC spectrum of <b>1</b> in $\text{CD}_3\text{OD}$ .....                                      | 5  |
| <b>Figure S4.</b> HMBC spectrum of <b>1</b> in $\text{CD}_3\text{OD}$ .....                                      | 5  |
| <b>Figure S5.</b> $^1\text{H}$ - $^1\text{H}$ COSY spectrum of <b>1</b> in $\text{CD}_3\text{OD}$ .....          | 6  |
| <b>Figure S6.</b> NOESY spectrum of <b>1</b> in $\text{CD}_3\text{OD}$ .....                                     | 6  |
| <b>Figure S7.</b> (+)-HRESIMS spectrum of <b>1</b> .....                                                         | 7  |
| <b>Figure S8.</b> IR spectrum of <b>1</b> .....                                                                  | 7  |
| <b>Figure S9.</b> UV spectrum of <b>1</b> .....                                                                  | 7  |
| <b>Figure S10.</b> $^1\text{H}$ NMR spectrum of <b>2</b> (400 MHz, $\text{CD}_3\text{OD}$ ) .....                | 8  |
| <b>Figure S11.</b> $^{13}\text{C}$ NMR spectrum of <b>2</b> (100 MHz, $\text{CD}_3\text{OD}$ ) .....             | 8  |
| <b>Figure S12.</b> HSQC spectrum of <b>2</b> in $\text{CD}_3\text{OD}$ .....                                     | 9  |
| <b>Figure S13.</b> HMBC spectrum of <b>2</b> in $\text{CD}_3\text{OD}$ .....                                     | 9  |
| <b>Figure S14.</b> $^1\text{H}$ - $^1\text{H}$ COSY spectrum of <b>2</b> in $\text{CD}_3\text{OD}$ .....         | 10 |
| <b>Figure S15.</b> NOESY spectrum of <b>2</b> in $\text{CD}_3\text{OD}$ .....                                    | 10 |
| <b>Figure S16.</b> (+)-HRESIMS spectrum of <b>2</b> .....                                                        | 11 |
| <b>Figure S17.</b> IR spectrum of <b>2</b> .....                                                                 | 11 |
| <b>Figure S18.</b> UV spectrum of <b>2</b> .....                                                                 | 11 |
| <b>Figure S19.</b> $^1\text{H}$ NMR spectrum of <b>3</b> (400 MHz, $\text{C}_5\text{D}_5\text{N}$ ) .....        | 12 |
| <b>Figure S20.</b> $^{13}\text{C}$ NMR spectrum of <b>3</b> (100 MHz, $\text{C}_5\text{D}_5\text{N}$ ) .....     | 12 |
| <b>Figure S21.</b> HSQC spectrum of <b>3</b> in $\text{C}_5\text{D}_5\text{N}$ .....                             | 13 |
| <b>Figure S22.</b> HMBC spectrum of <b>3</b> in $\text{C}_5\text{D}_5\text{N}$ .....                             | 13 |
| <b>Figure S23.</b> $^1\text{H}$ - $^1\text{H}$ COSY spectrum of <b>3</b> in $\text{C}_5\text{D}_5\text{N}$ ..... | 14 |
| <b>Figure S24.</b> NOESY spectrum of <b>3</b> in $\text{C}_5\text{D}_5\text{N}$ .....                            | 14 |
| <b>Figure S25.</b> (+)-HRESIMS spectrum of <b>3</b> .....                                                        | 15 |
| <b>Figure S26.</b> IR spectrum of <b>3</b> .....                                                                 | 15 |
| <b>Figure S27.</b> UV spectrum of <b>3</b> .....                                                                 | 15 |
| <b>Figure S28.</b> $^1\text{H}$ NMR spectrum of <b>4</b> (400 MHz, $\text{C}_5\text{D}_5\text{N}$ ) .....        | 16 |
| <b>Figure S29.</b> $^{13}\text{C}$ NMR spectrum of <b>4</b> (100 MHz, $\text{C}_5\text{D}_5\text{N}$ ) .....     | 16 |
| <b>Figure S30.</b> HSQC spectrum of <b>4</b> in $\text{C}_5\text{D}_5\text{N}$ .....                             | 17 |
| <b>Figure S31.</b> HMBC spectrum of <b>4</b> in $\text{C}_5\text{D}_5\text{N}$ .....                             | 17 |
| <b>Figure S32.</b> $^1\text{H}$ - $^1\text{H}$ COSY spectrum of <b>4</b> in $\text{C}_5\text{D}_5\text{N}$ ..... | 18 |
| <b>Figure S33.</b> NOESY spectrum of <b>4</b> in $\text{C}_5\text{D}_5\text{N}$ .....                            | 18 |
| <b>Figure S34.</b> (+)-HRESIMS spectrum of <b>4</b> .....                                                        | 19 |
| <b>Figure S35.</b> IR spectrum of <b>4</b> .....                                                                 | 19 |
| <b>Figure S36.</b> UV spectrum of <b>4</b> .....                                                                 | 19 |
| <b>Figure S37.</b> $^1\text{H}$ NMR spectrum of <b>5</b> (400 MHz, $\text{C}_5\text{D}_5\text{N}$ ) .....        | 20 |
| <b>Figure S38.</b> $^{13}\text{C}$ NMR spectrum of <b>5</b> (100 MHz, $\text{C}_5\text{D}_5\text{N}$ ) .....     | 20 |
| <b>Figure S39.</b> HSQC spectrum of <b>5</b> in $\text{C}_5\text{D}_5\text{N}$ .....                             | 21 |
| <b>Figure S40.</b> HMBC spectrum of <b>5</b> in $\text{C}_5\text{D}_5\text{N}$ .....                             | 21 |
| <b>Figure S41.</b> $^1\text{H}$ - $^1\text{H}$ COSY spectrum of <b>5</b> in $\text{C}_5\text{D}_5\text{N}$ ..... | 22 |
| <b>Figure S42.</b> NOESY spectrum of <b>5</b> in $\text{C}_5\text{D}_5\text{N}$ .....                            | 22 |
| <b>Figure S43.</b> (+)-HRESIMS spectrum of <b>5</b> .....                                                        | 23 |

|                                                                                                                  |    |
|------------------------------------------------------------------------------------------------------------------|----|
| <b>Figure S44.</b> IR spectrum of <b>5</b> .....                                                                 | 23 |
| <b>Figure S45.</b> UV spectrum of <b>5</b> .....                                                                 | 23 |
| <b>Figure S46.</b> $^1\text{H}$ NMR spectrum of <b>6</b> (400 MHz, $\text{C}_5\text{D}_5\text{N}$ ) .....        | 24 |
| <b>Figure S47.</b> $^{13}\text{C}$ NMR spectrum of <b>6</b> (100 MHz, $\text{C}_5\text{D}_5\text{N}$ ).....      | 24 |
| <b>Figure S48.</b> HSQC spectrum of <b>6</b> in $\text{C}_5\text{D}_5\text{N}$ .....                             | 25 |
| <b>Figure S49.</b> HMBC spectrum of <b>6</b> in $\text{C}_5\text{D}_5\text{N}$ .....                             | 25 |
| <b>Figure S50.</b> $^1\text{H}$ - $^1\text{H}$ COSY spectrum of <b>6</b> in $\text{C}_5\text{D}_5\text{N}$ ..... | 26 |
| <b>Figure S51.</b> NOESY spectrum of <b>6</b> in $\text{C}_5\text{D}_5\text{N}$ .....                            | 26 |
| <b>Figure S52.</b> (+)-HRESIMS spectrum of <b>6</b> .....                                                        | 27 |
| <b>Figure S53.</b> IR spectrum of <b>6</b> .....                                                                 | 27 |
| <b>Figure S54.</b> UV spectrum of <b>6</b> .....                                                                 | 27 |

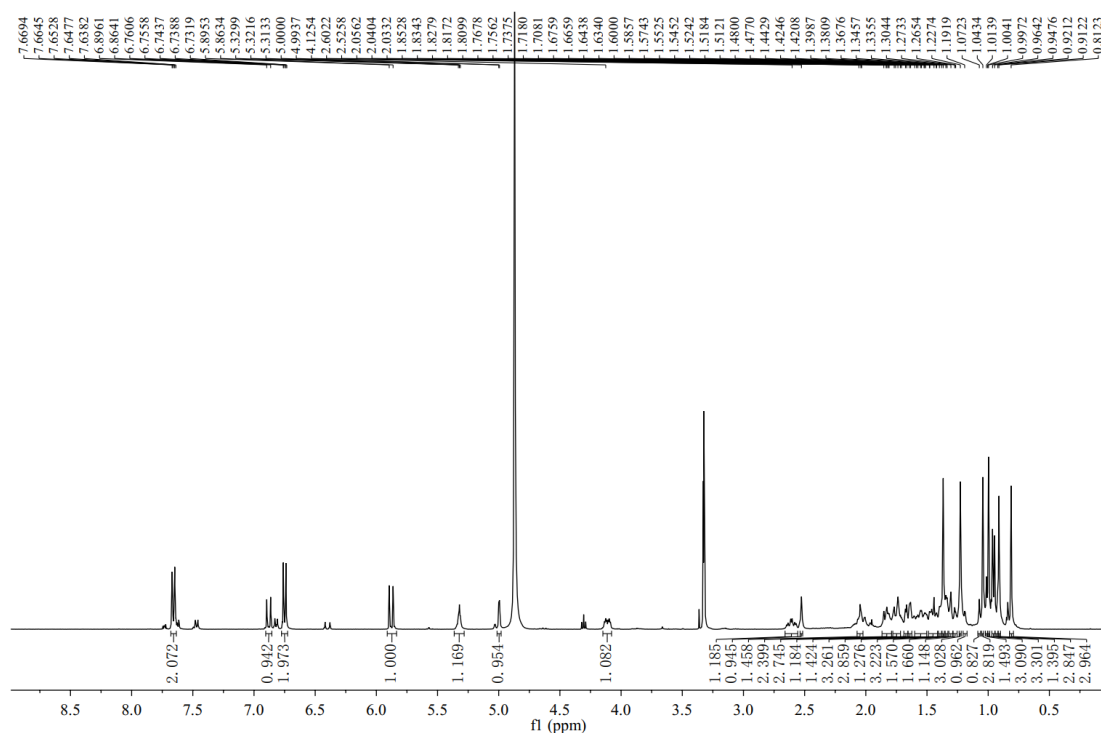

Figure S1.  $^1\text{H}$  NMR spectrum of **1** (400 MHz,  $\text{CD}_3\text{OD}$ )

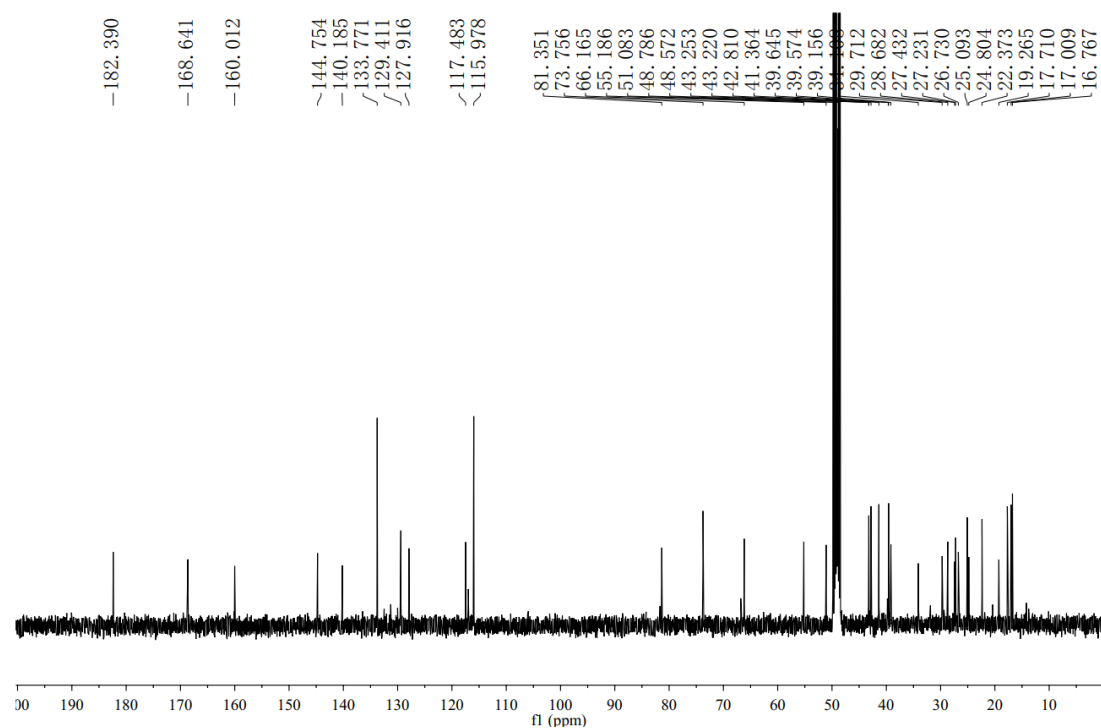

Figure S2.  $^{13}\text{C}$  NMR spectrum of **1** (100 MHz,  $\text{CD}_3\text{OD}$ )

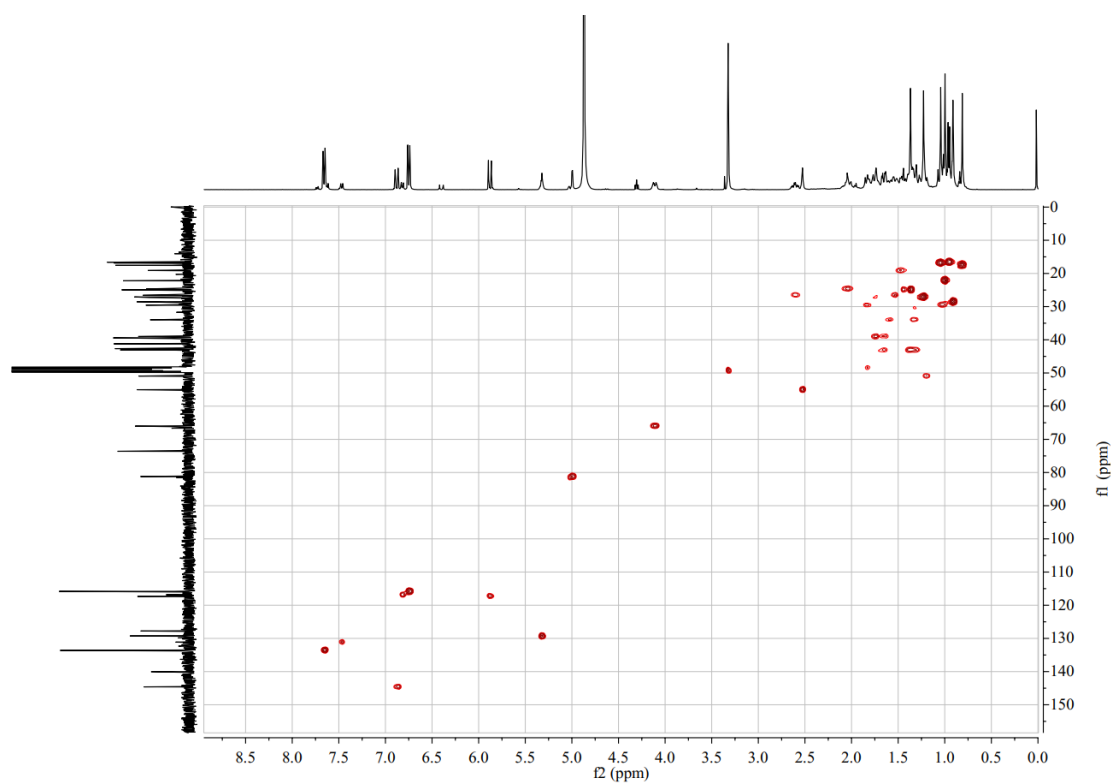

Figure S3. HSQC spectrum of 1 in CD<sub>3</sub>OD

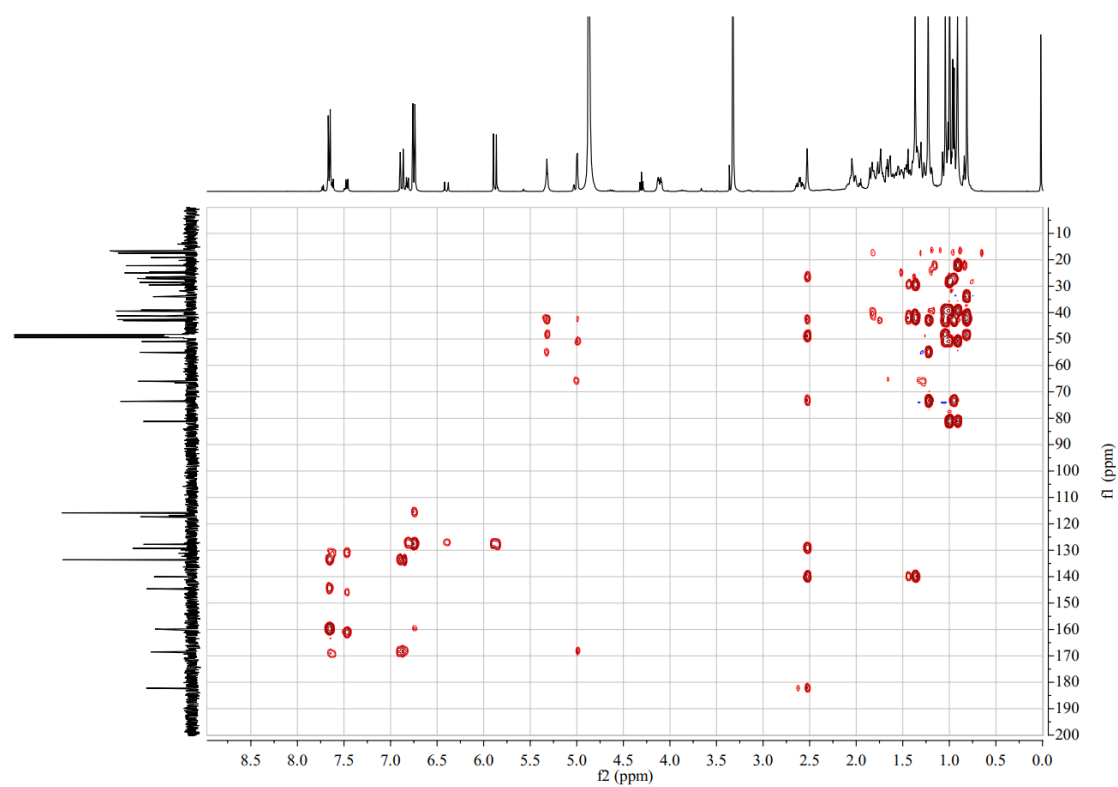

Figure S4. HMBC spectrum of 1 in CD<sub>3</sub>OD

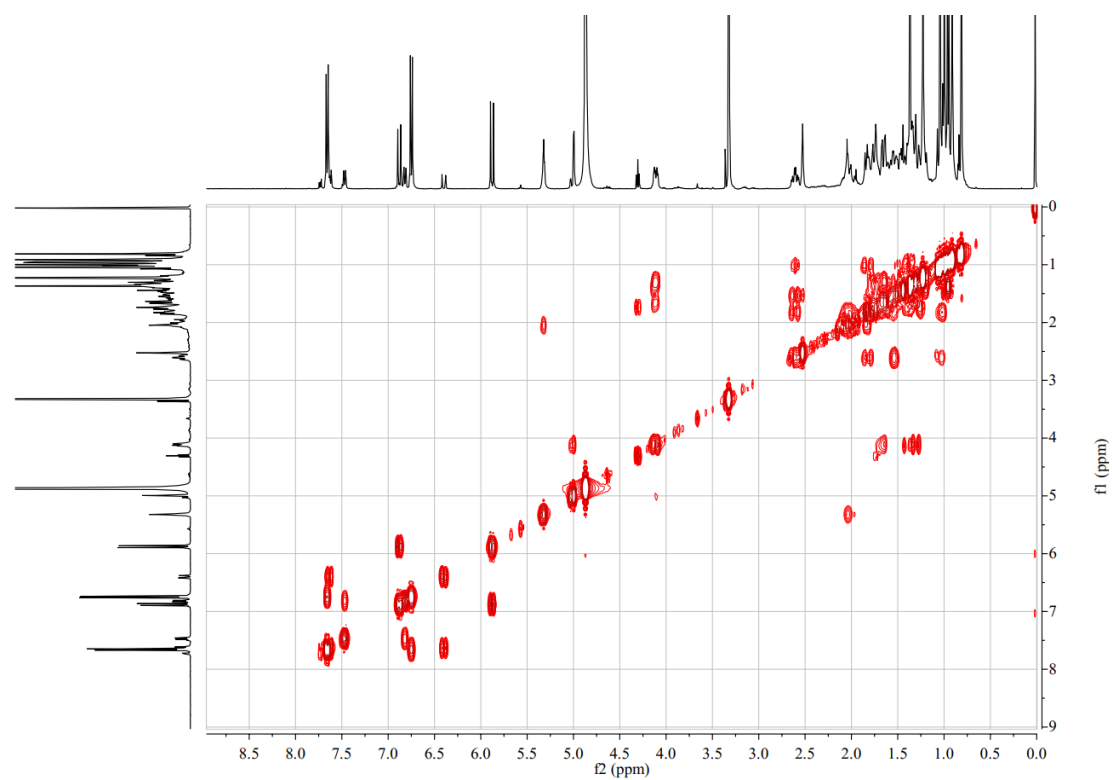

**Figure S5.**  $^1\text{H}$ - $^1\text{H}$  COSY spectrum of **1** in  $\text{CD}_3\text{OD}$

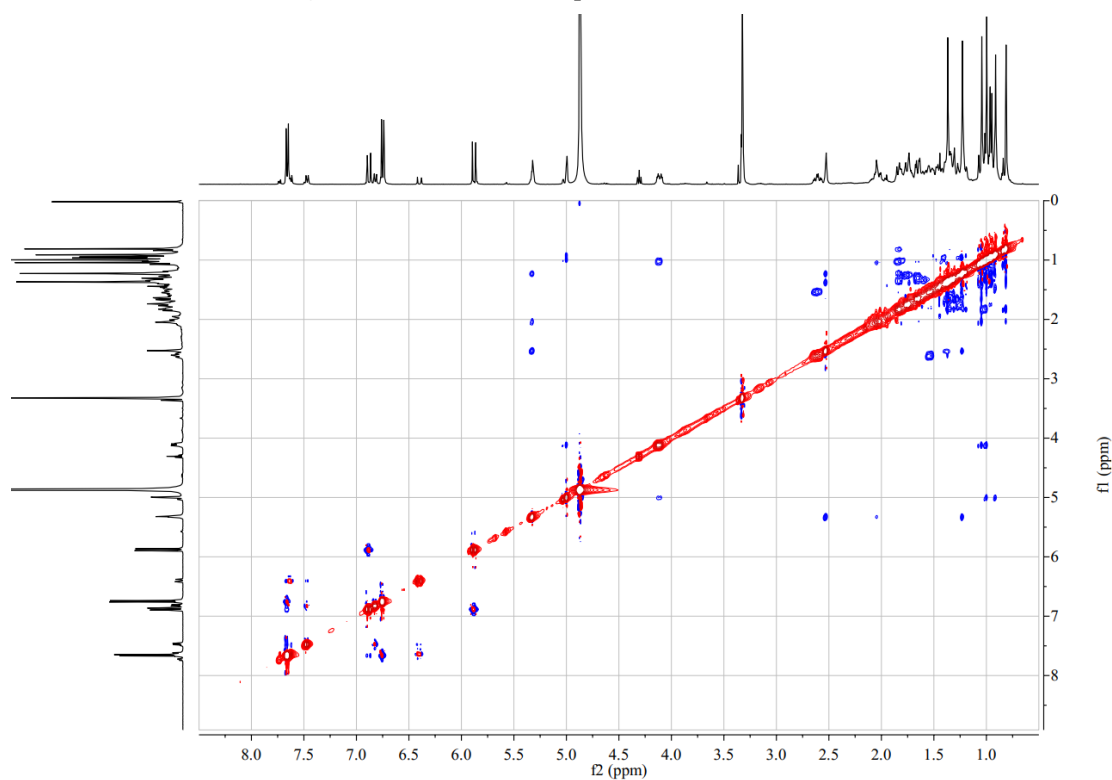

**Figure S6.** NOESY spectrum of **1** in  $\text{CD}_3\text{OD}$

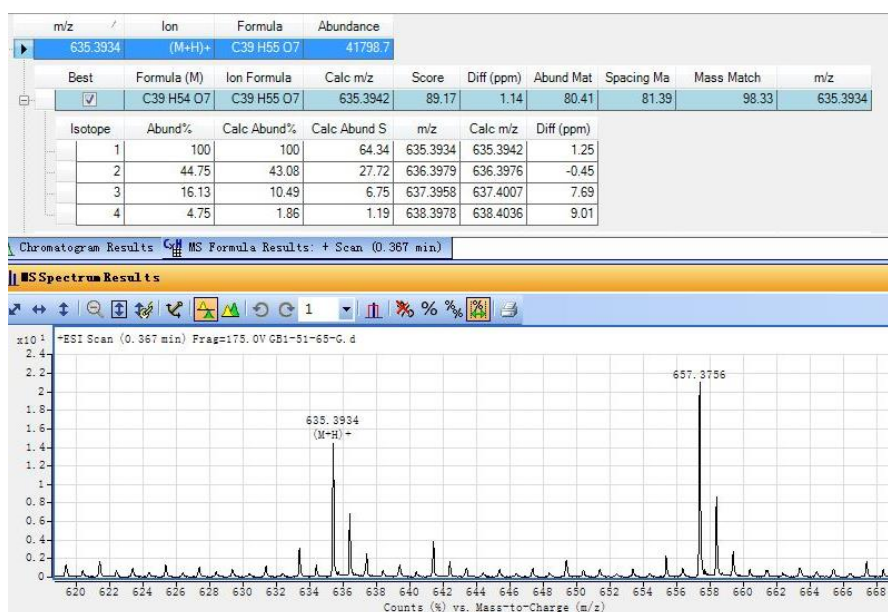

Figure S7. (+)-HRESIMS spectrum of **1**

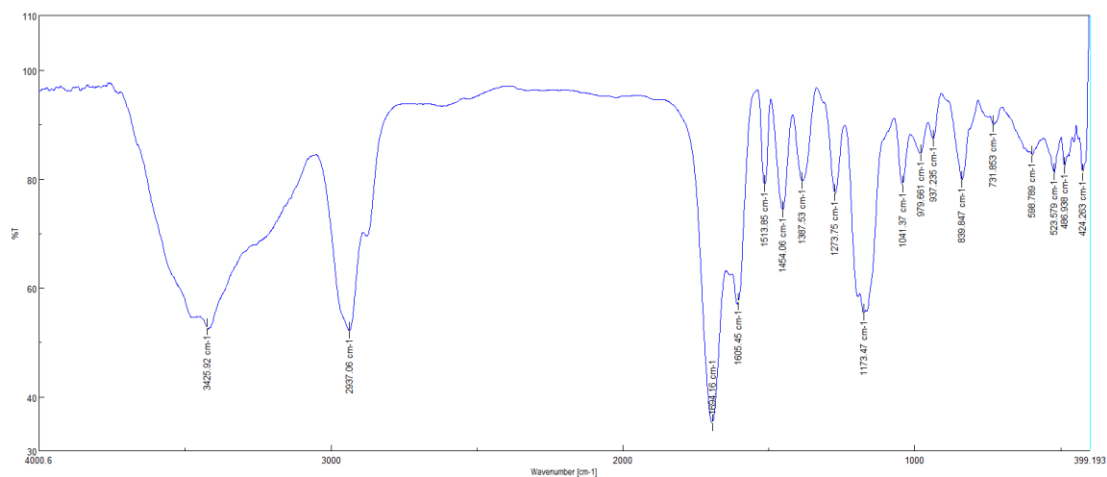

Figure S8. IR spectrum of **1**

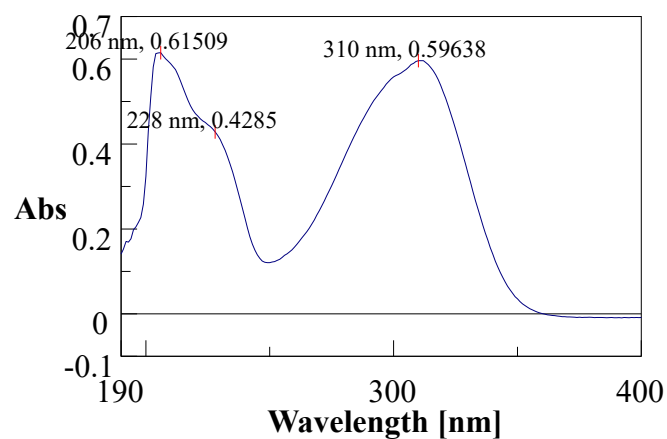

Figure S9. UV spectrum of **1**

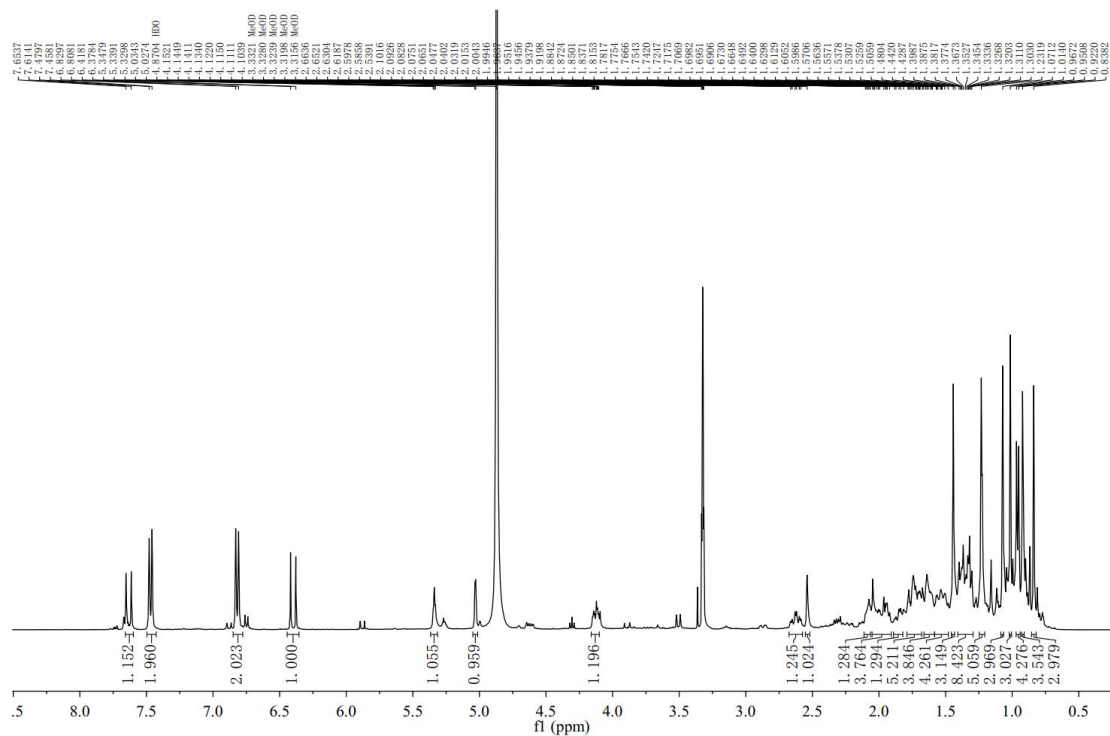

Figure S10.  $^1\text{H}$  NMR spectrum of **2** (400 MHz,  $\text{CD}_3\text{OD}$ )

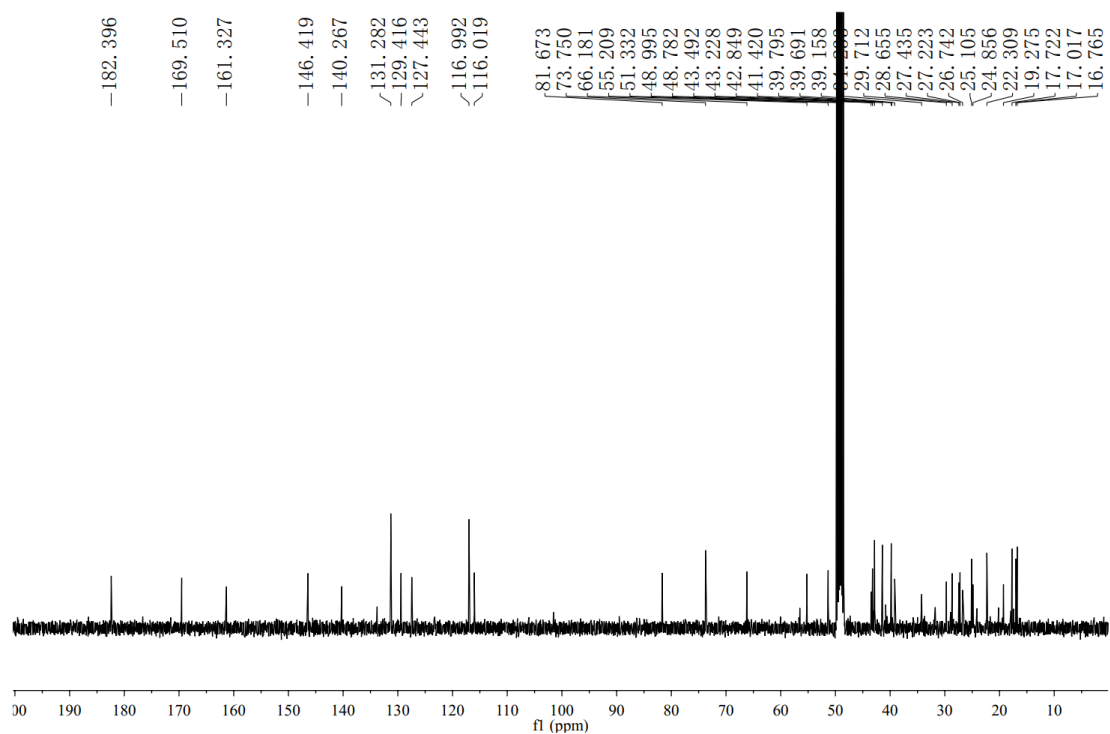

Figure S11.  $^{13}\text{C}$  NMR spectrum of **2** (100 MHz,  $\text{CD}_3\text{OD}$ )



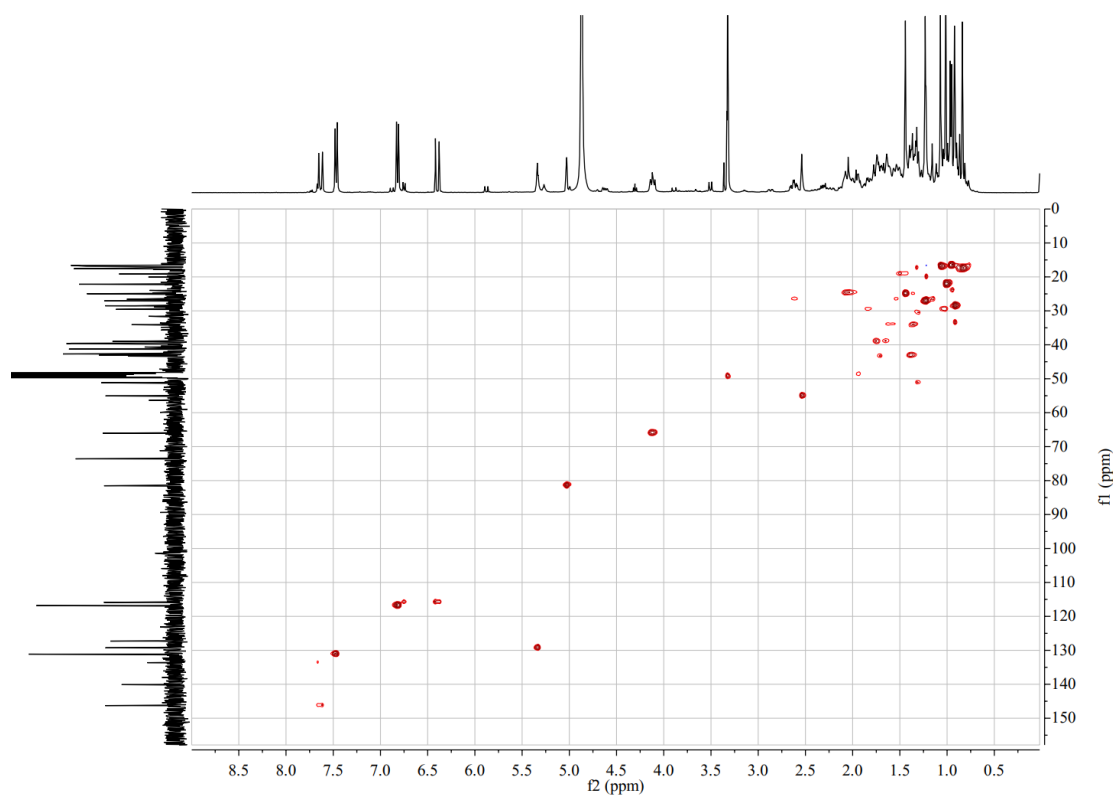

Figure S12. HSQC spectrum of **2** in CD<sub>3</sub>OD

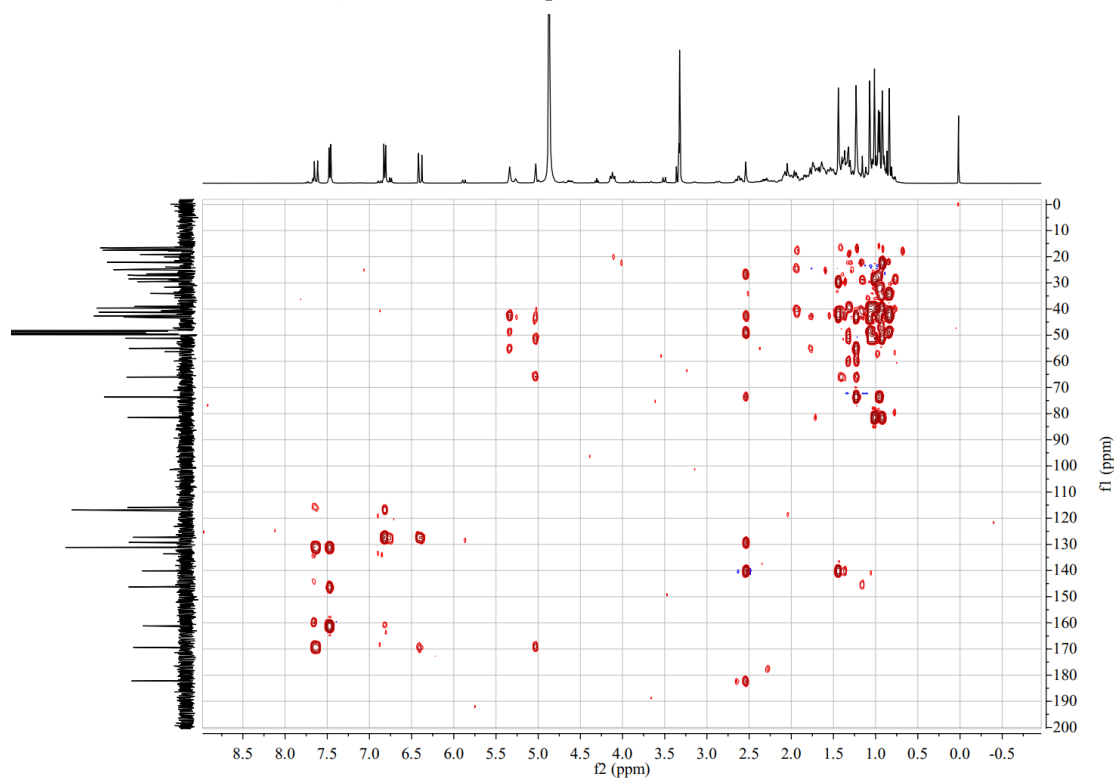

Figure S13. HMBC spectrum of **2** in CD<sub>3</sub>OD

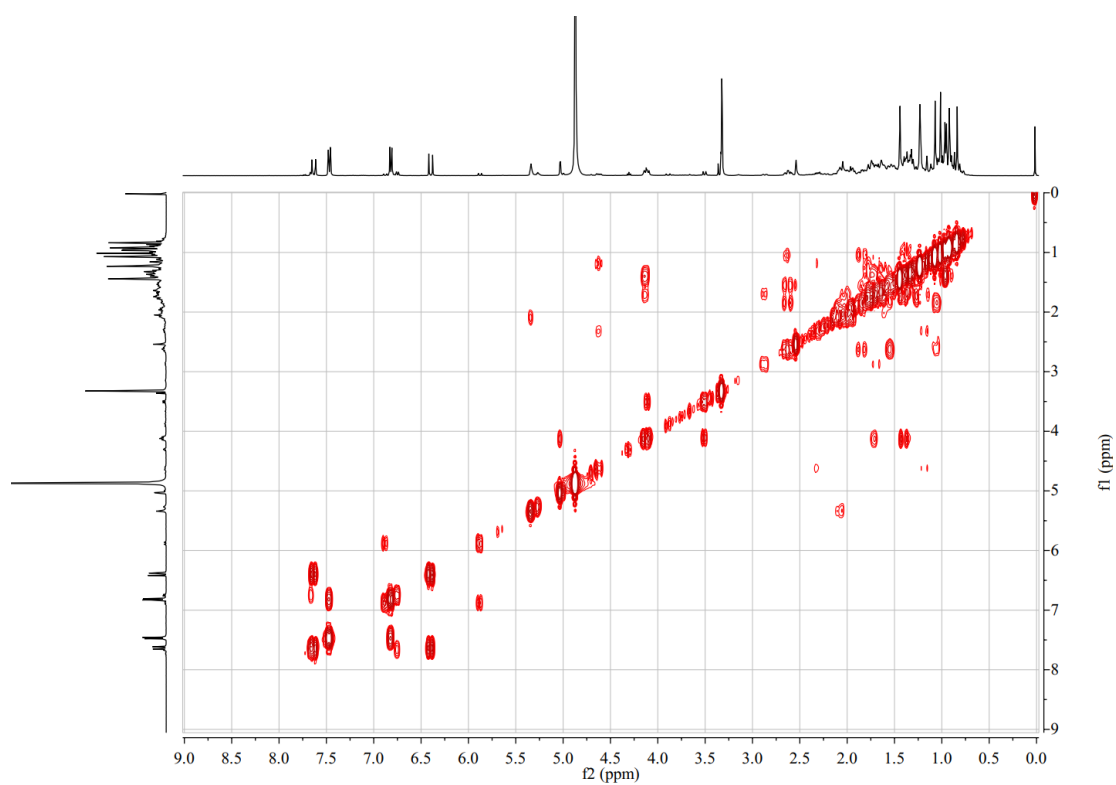

**Figure S14.**  $^1\text{H}$ - $^1\text{H}$  COSY spectrum of **2** in  $\text{CD}_3\text{OD}$

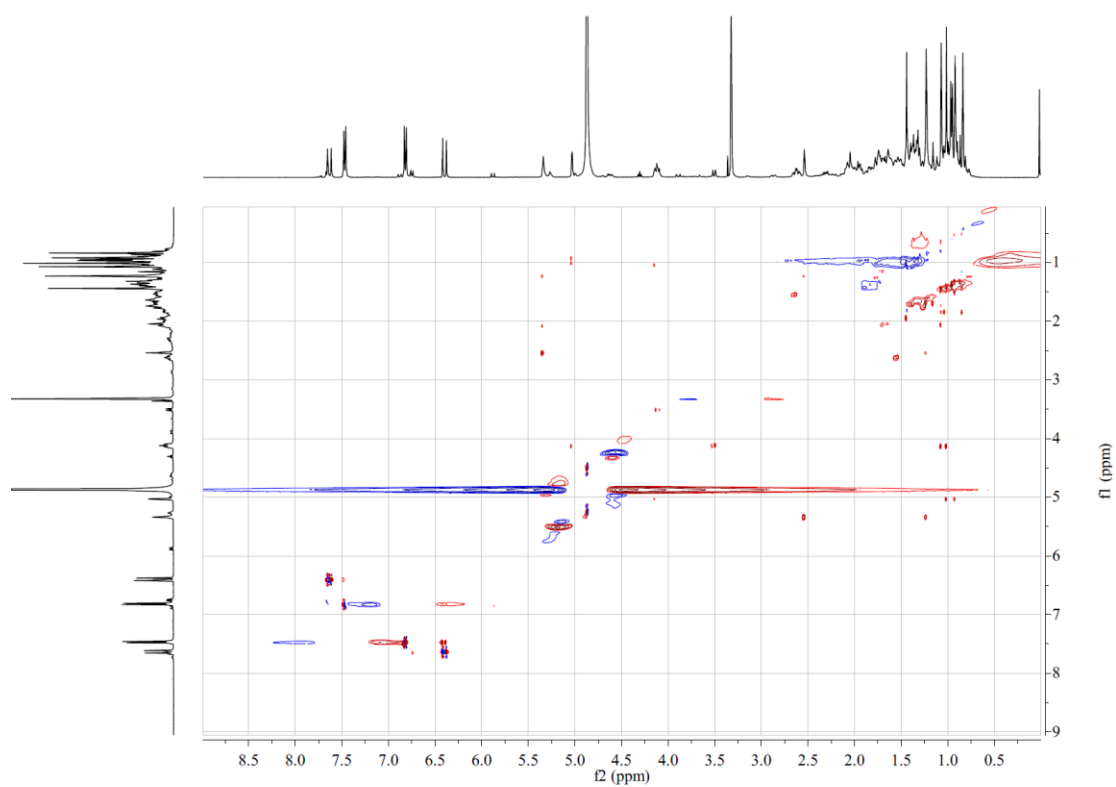

**Figure S15.** NOESY spectrum of **2** in  $\text{CD}_3\text{OD}$

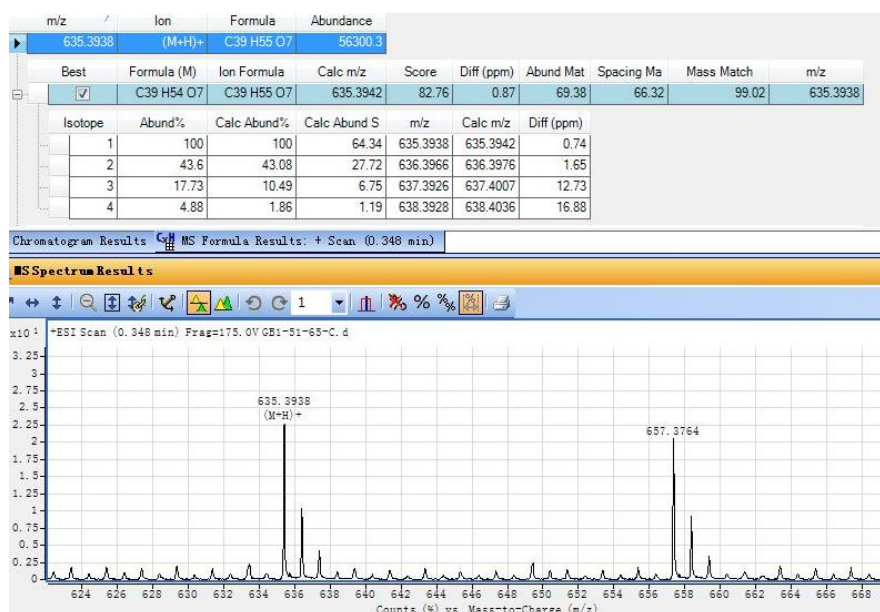

Figure S16. (+)-HRESIMS spectrum of **2**

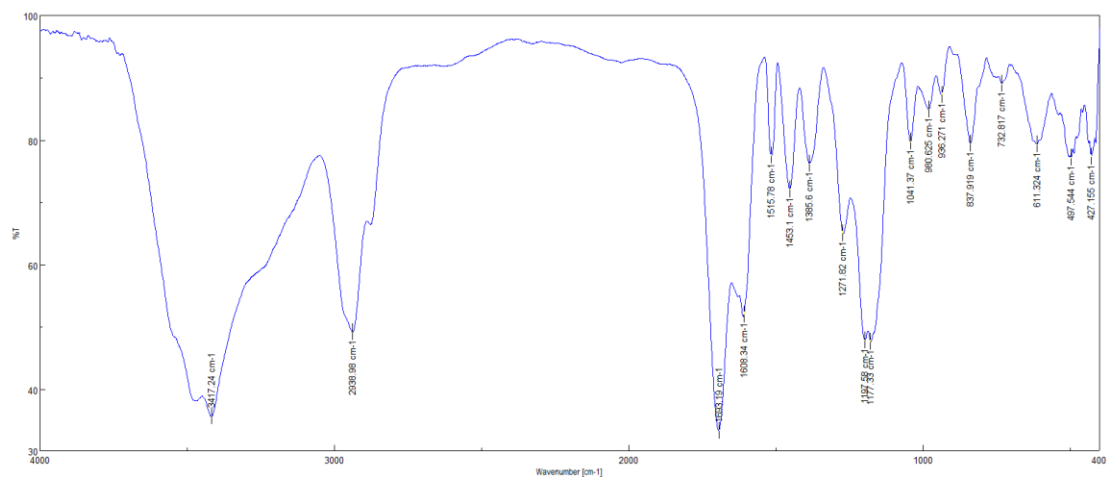

Figure S17. IR spectrum of **2**

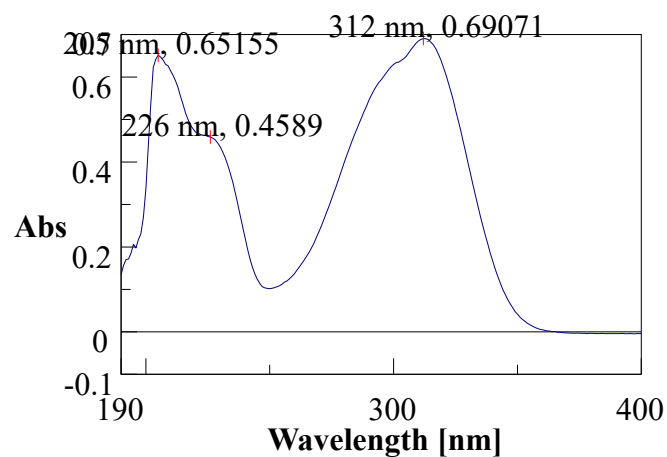

Figure S18. UV spectrum of **2**

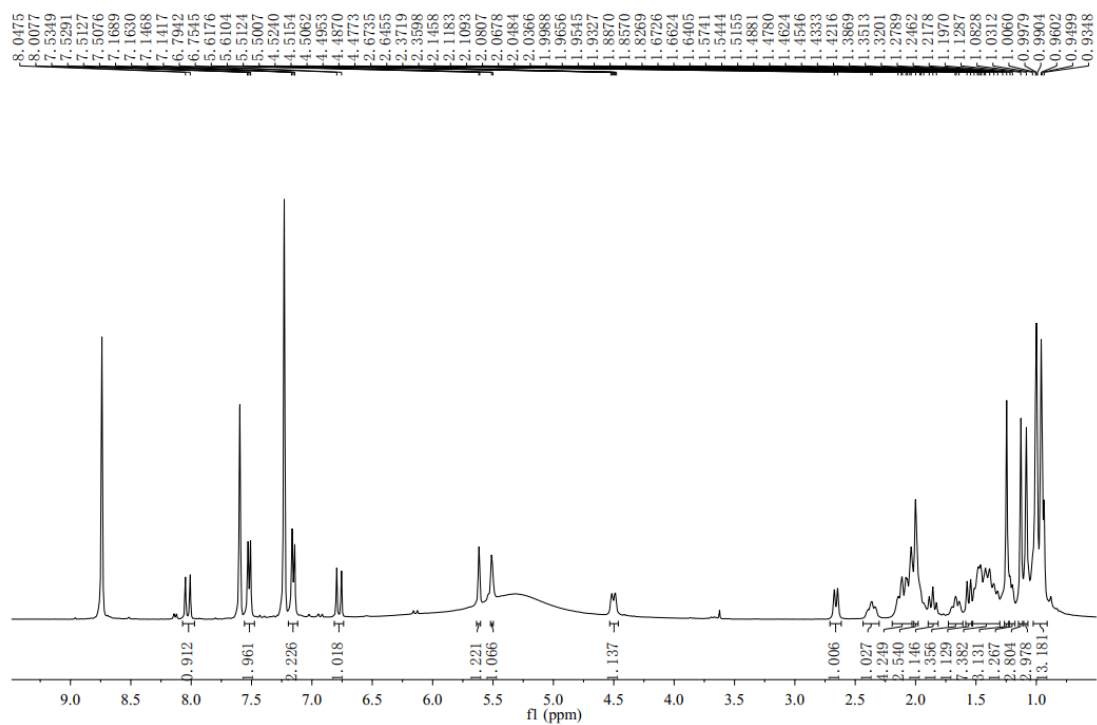

Figure S19.  $^1\text{H}$  NMR spectrum of **3** (400 MHz,  $\text{C}_5\text{D}_5\text{N}$ )

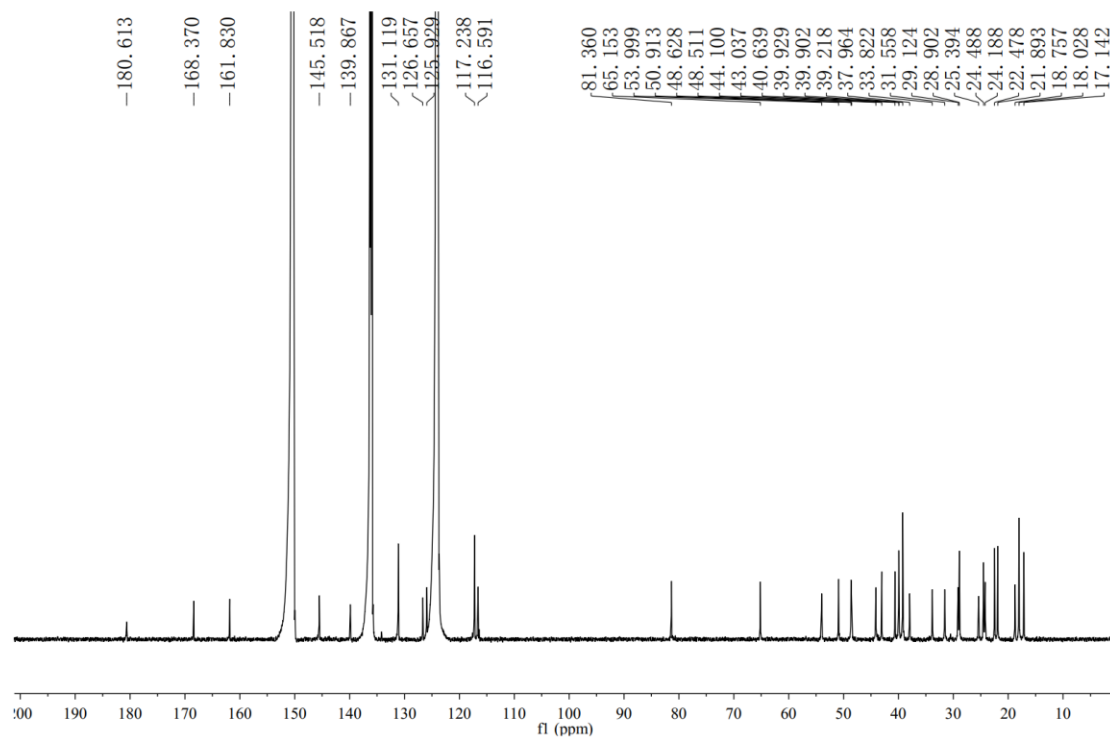

Figure S20.  $^{13}\text{C}$  NMR spectrum of **3** (100 MHz,  $\text{C}_5\text{D}_5\text{N}$ )

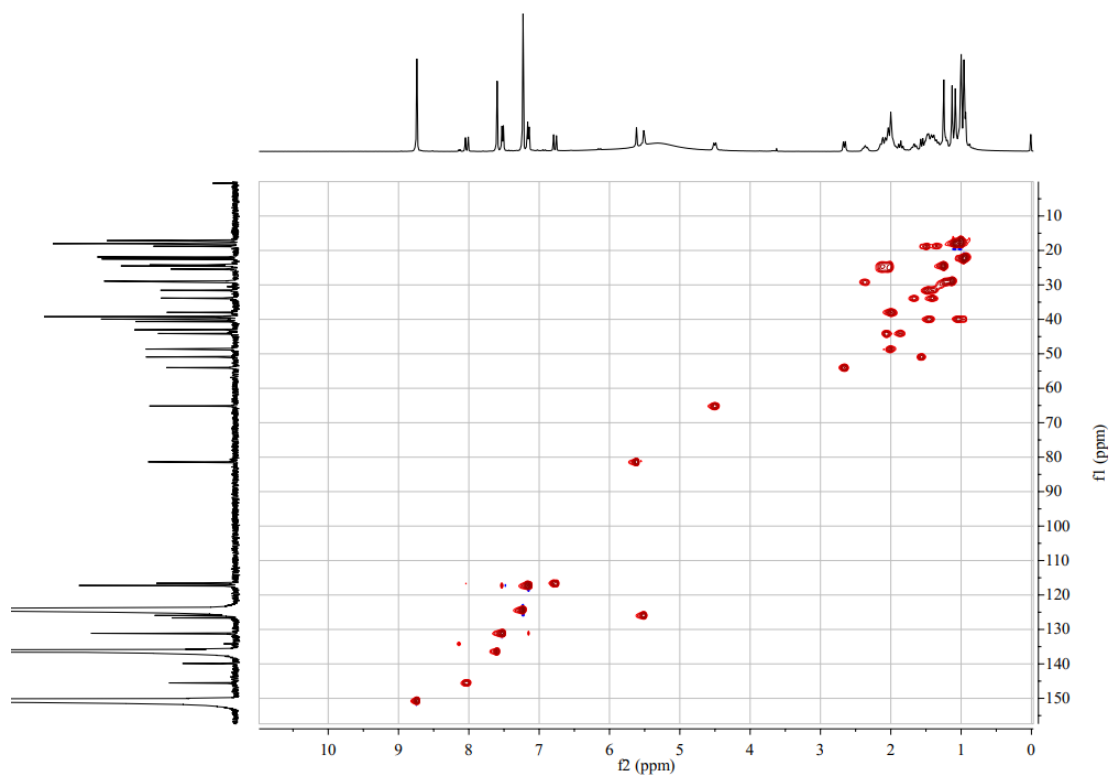

Figure S21. HSQC spectrum of **3** in C<sub>5</sub>D<sub>5</sub>N

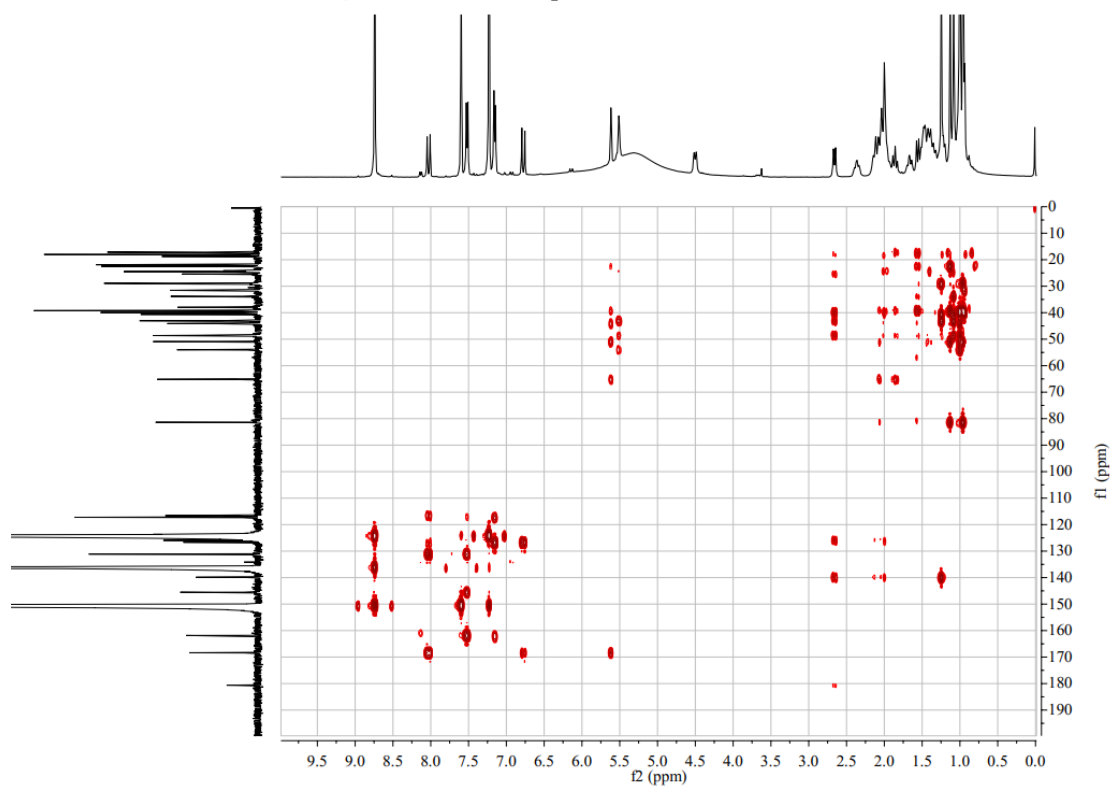

Figure S22. HMBC spectrum of **3** in C<sub>5</sub>D<sub>5</sub>N

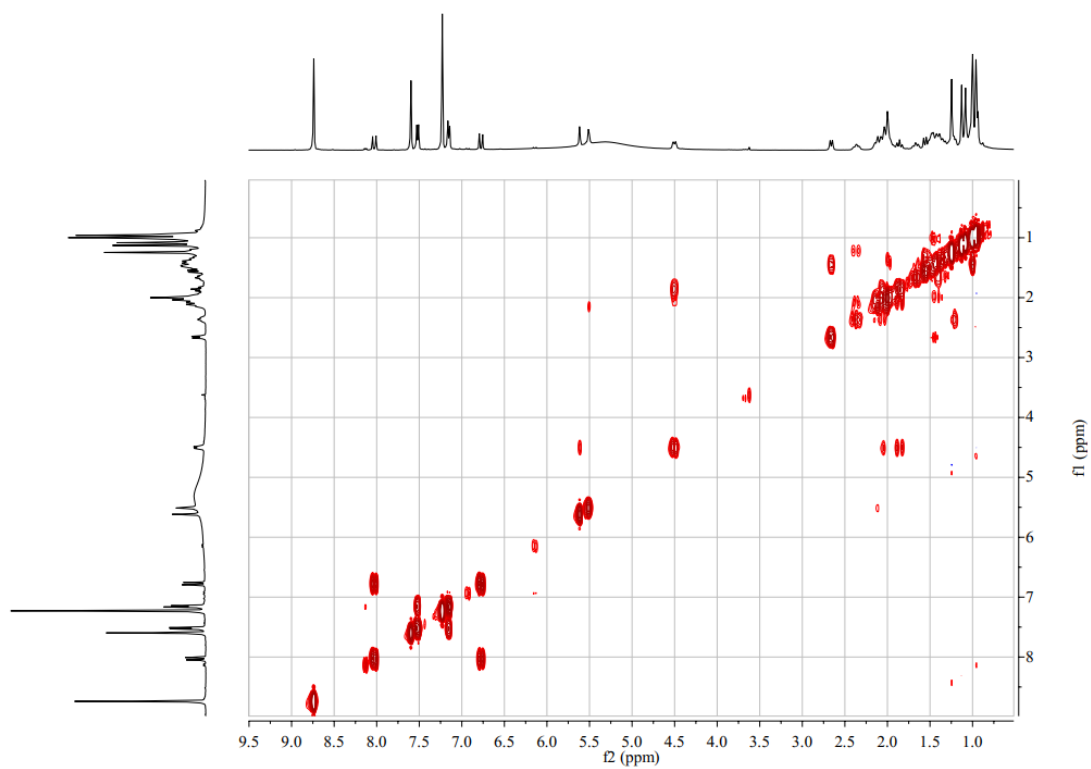

Figure S23.  $^1\text{H}$ - $^1\text{H}$  COSY spectrum of **3** in  $\text{C}_5\text{D}_5\text{N}$

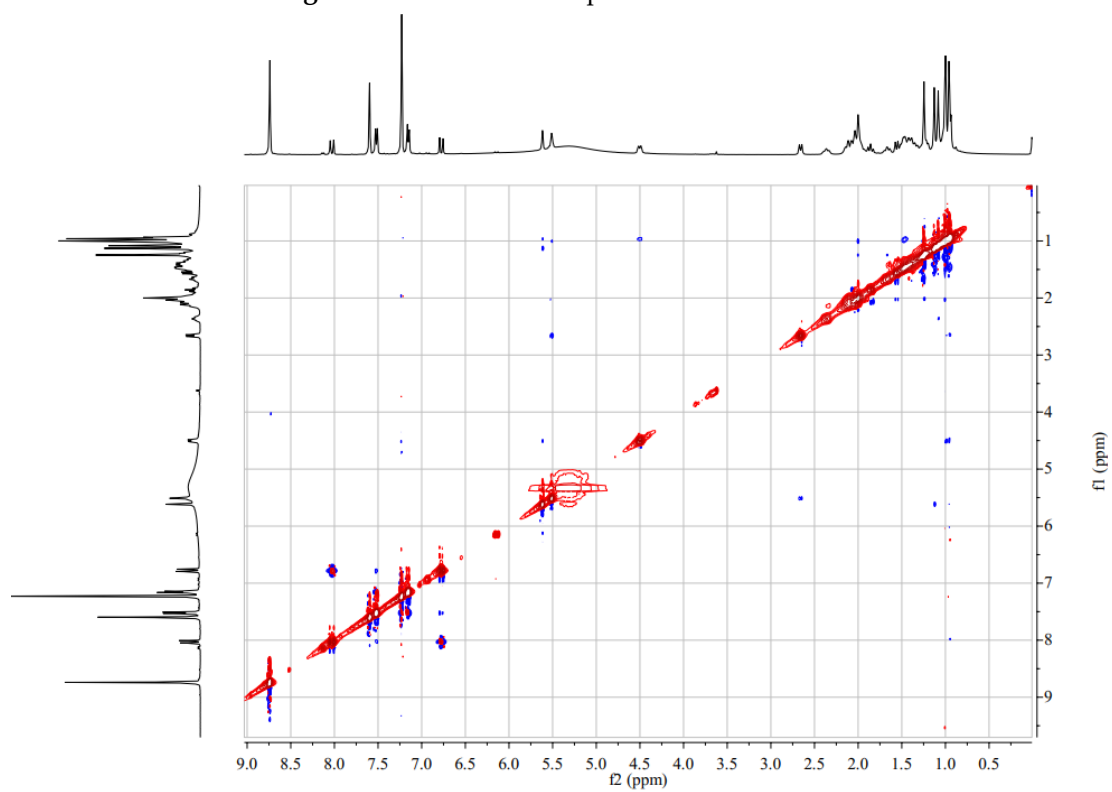

Figure S24. NOESY spectrum of **3** in  $\text{C}_5\text{D}_5\text{N}$

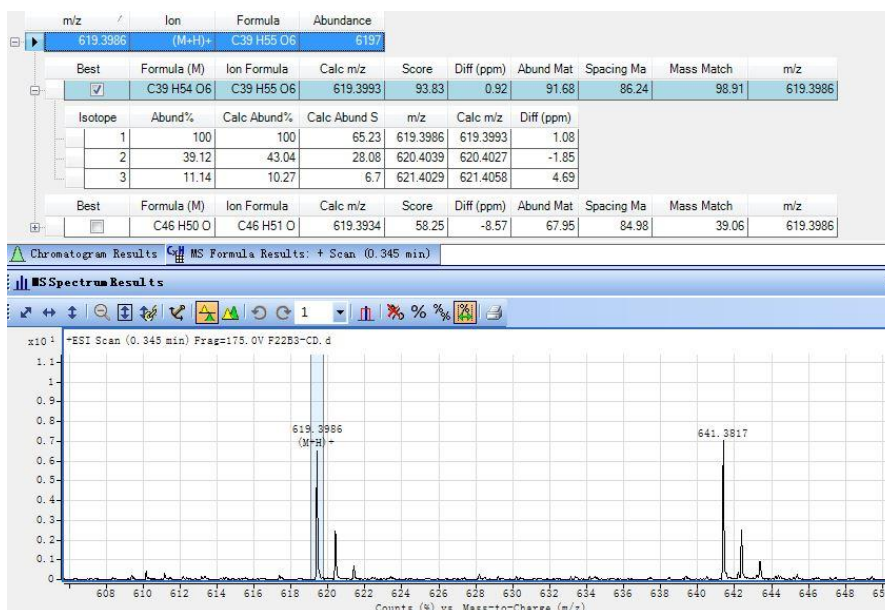

Figure S25. (+)-HRESIMS spectrum of **3**

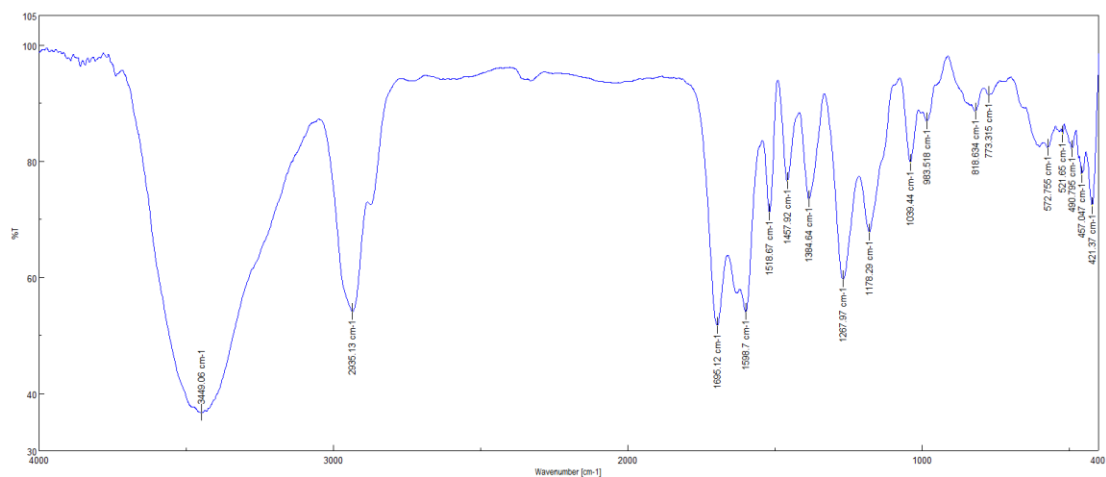

Figure S26. IR spectrum of **3**

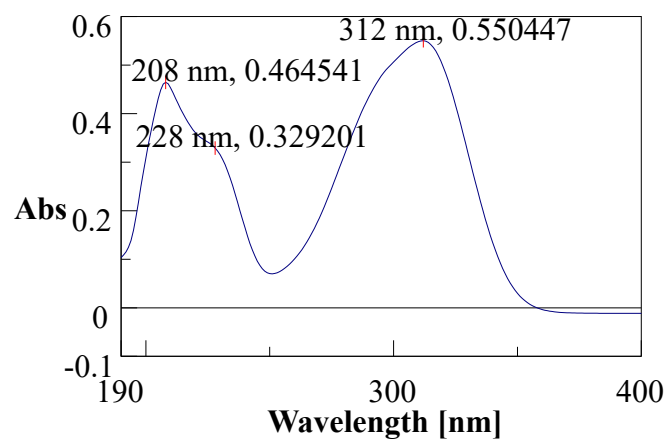

Figure S27. UV spectrum of **3**

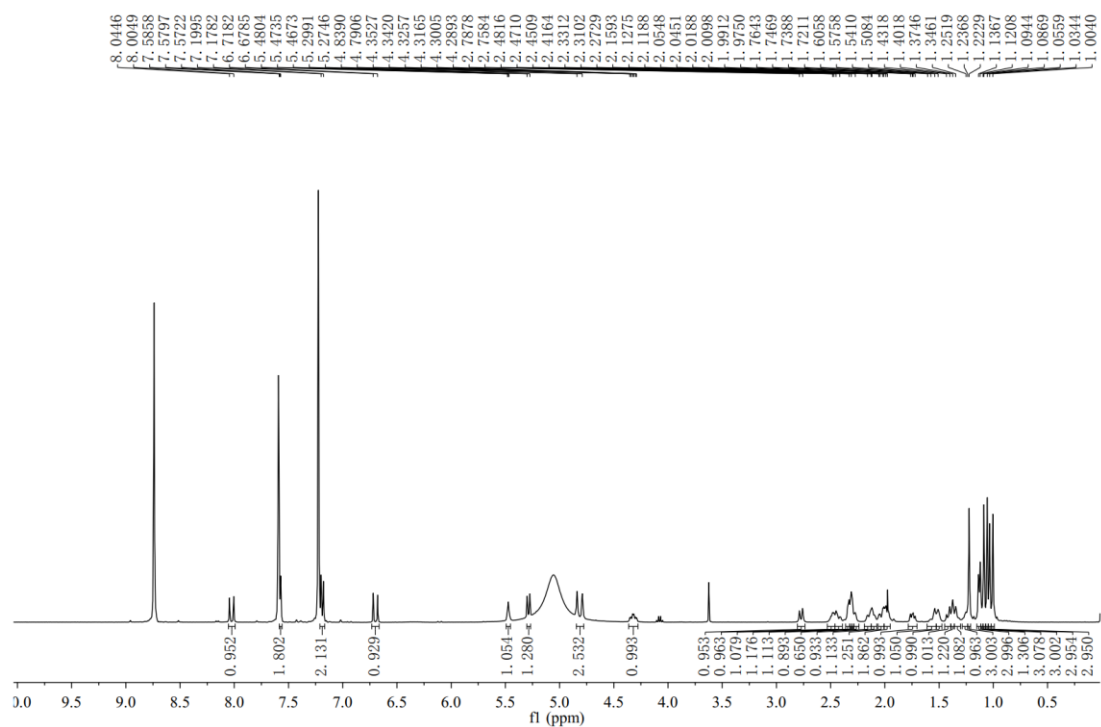

Figure S28.  $^1\text{H}$  NMR spectrum of **4** (400 MHz,  $\text{C}_5\text{D}_5\text{N}$ )

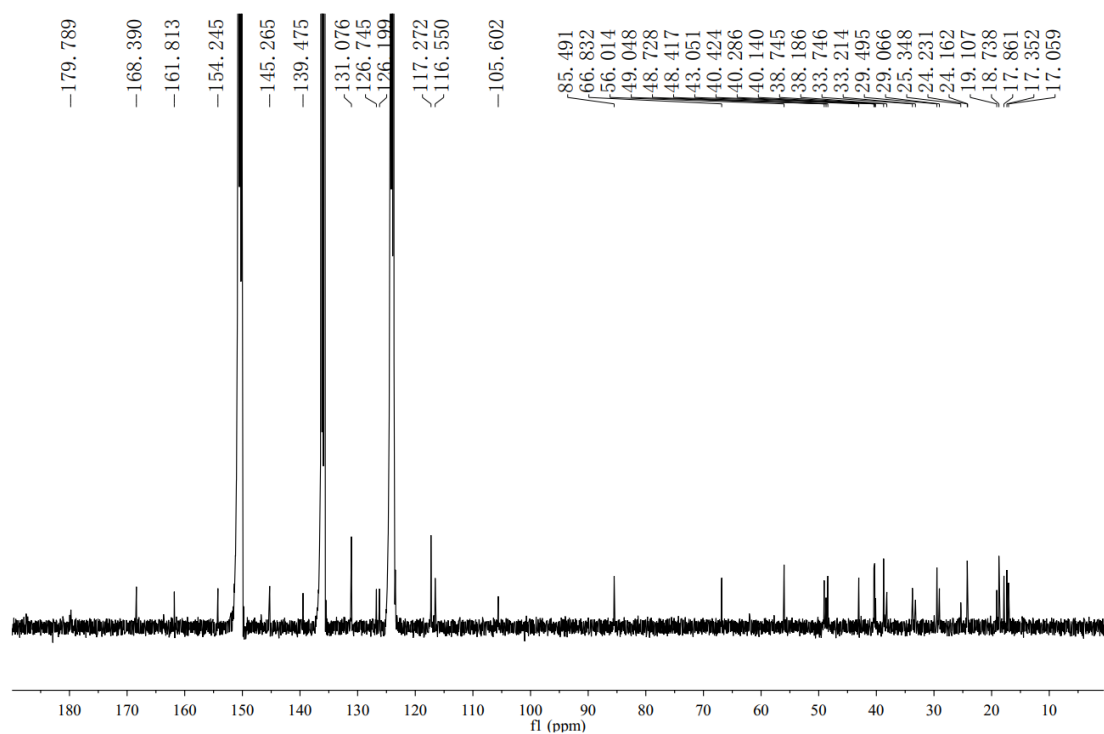

Figure S29.  $^{13}\text{C}$  NMR spectrum of **4** (100 MHz,  $\text{C}_5\text{D}_5\text{N}$ )



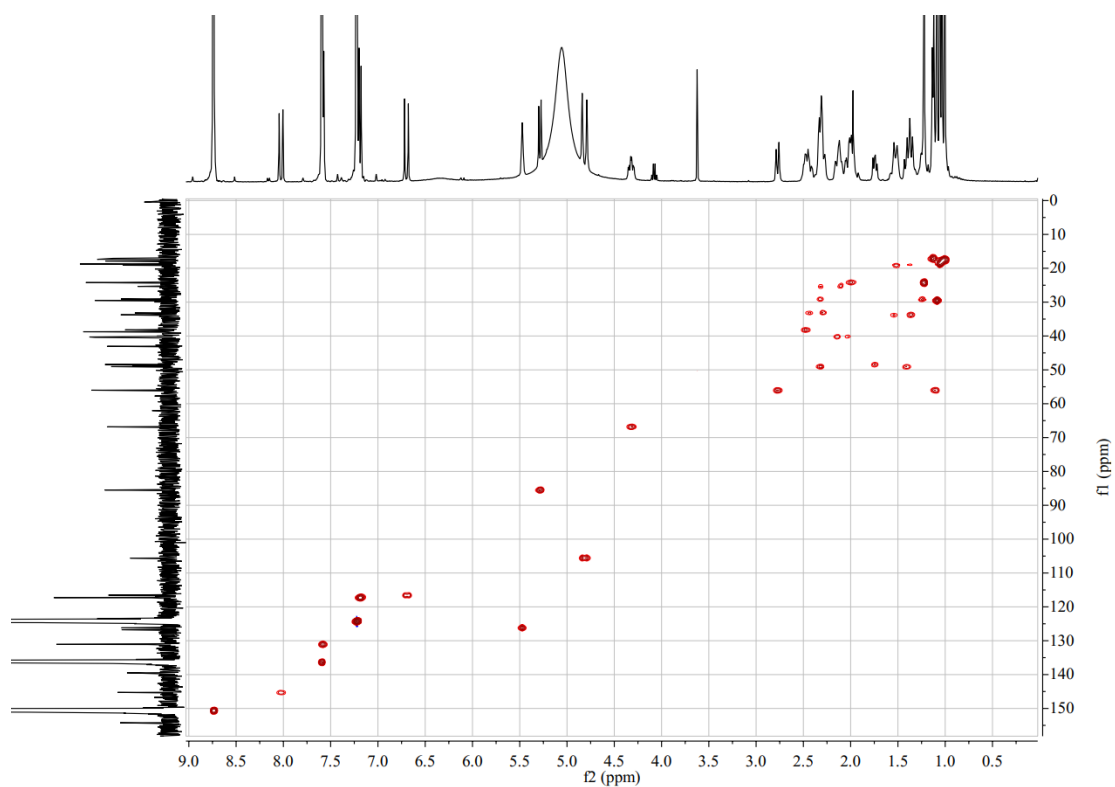

Figure S30. HSQC spectrum of 4 in  $\text{C}_5\text{D}_5\text{N}$

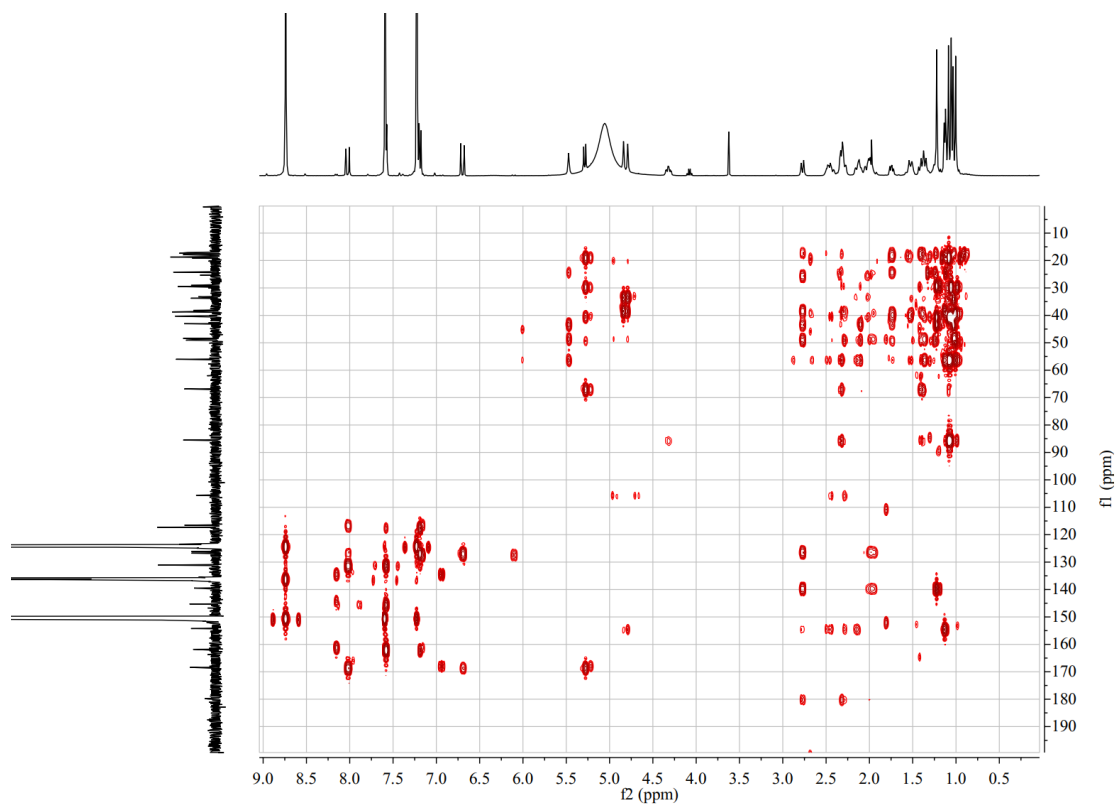

Figure S31. HMBC spectrum of 4 in  $\text{C}_5\text{D}_5\text{N}$

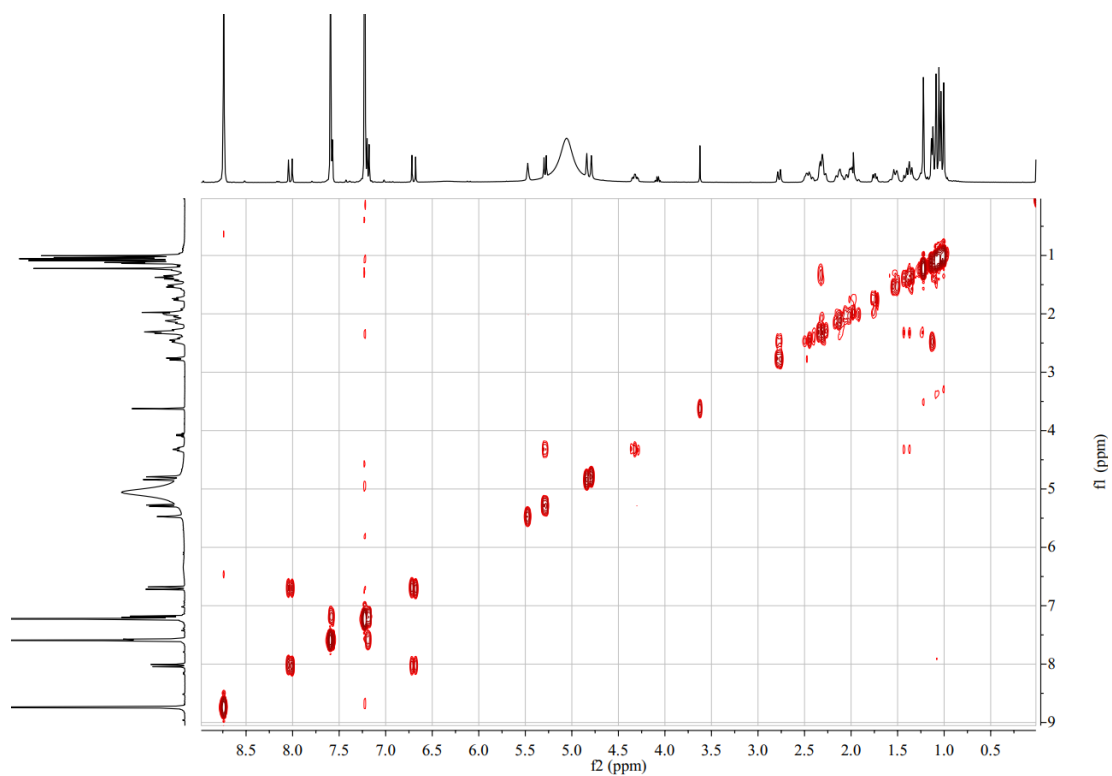

**Figure S32.**  $^1\text{H}$ - $^1\text{H}$  COSY spectrum of **4** in  $\text{C}_5\text{D}_5\text{N}$

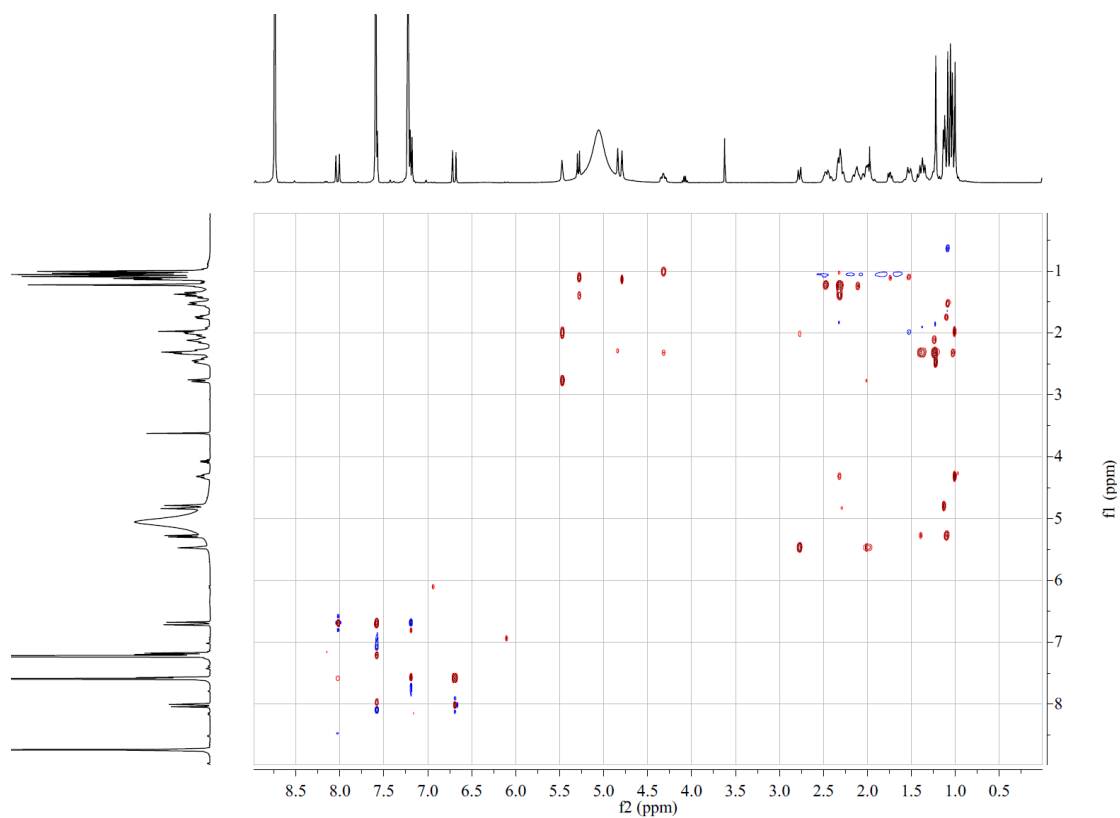

**Figure S33.** NOESY spectrum of **4** in  $\text{C}_5\text{D}_5\text{N}$

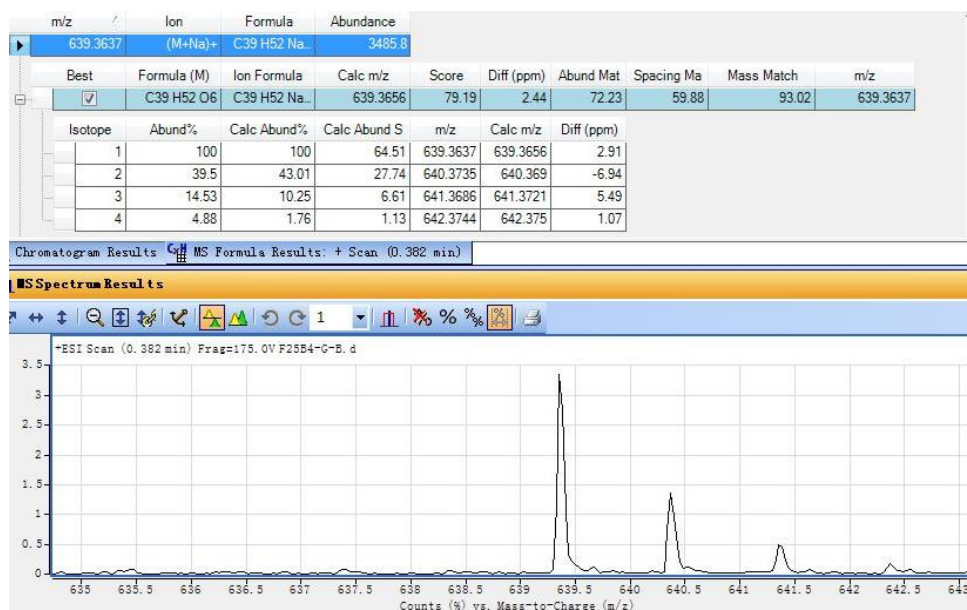

Figure S34. (+)-HRESIMS spectrum of **4**

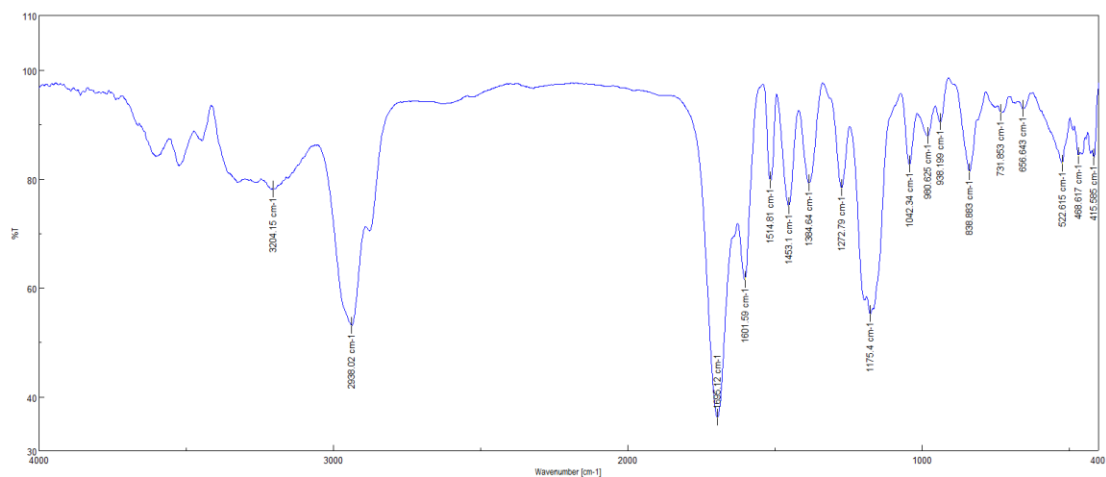

Figure S35. IR spectrum of **4**

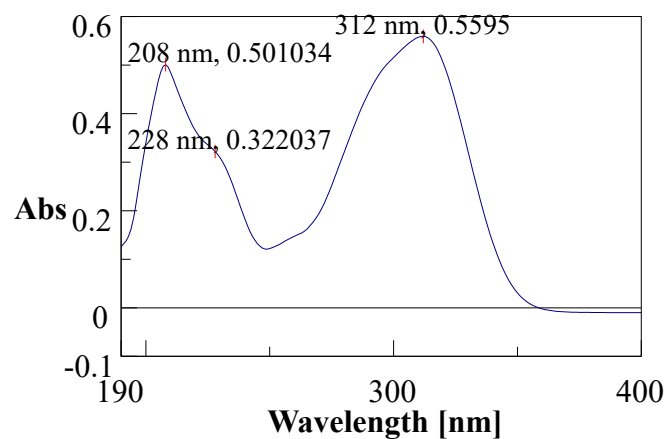

Figure S36. UV spectrum of **4**

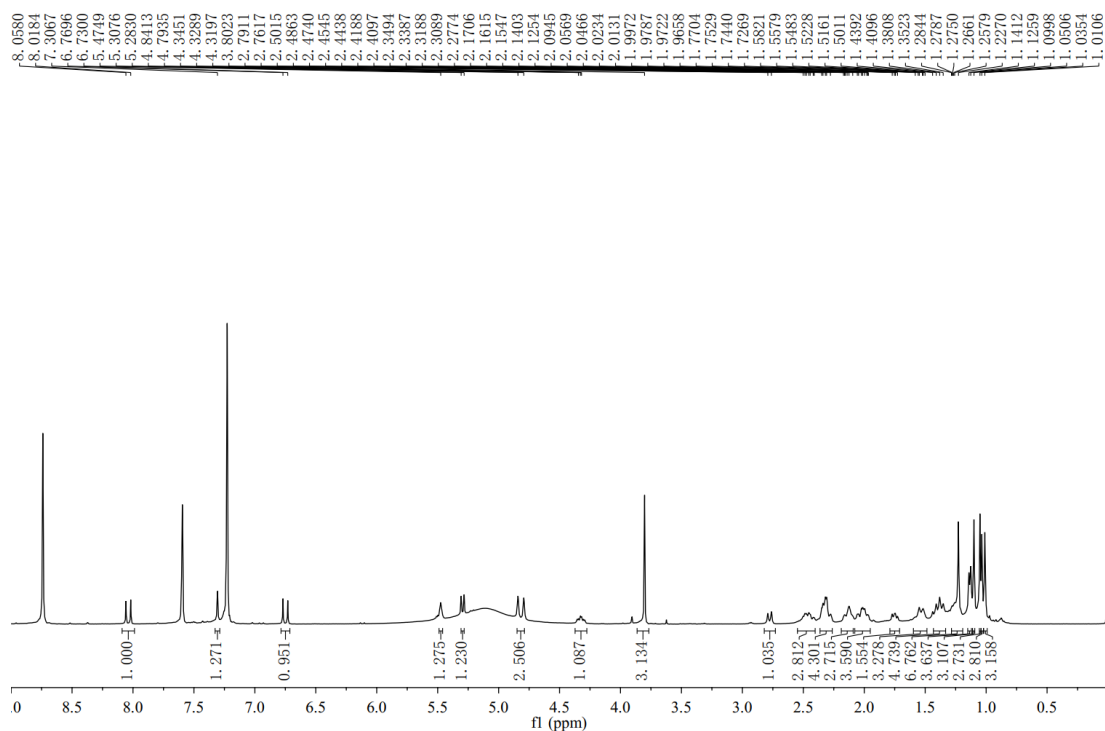

Figure S37. <sup>1</sup>H NMR spectrum of 5 (400 MHz, C<sub>5</sub>D<sub>5</sub>N)

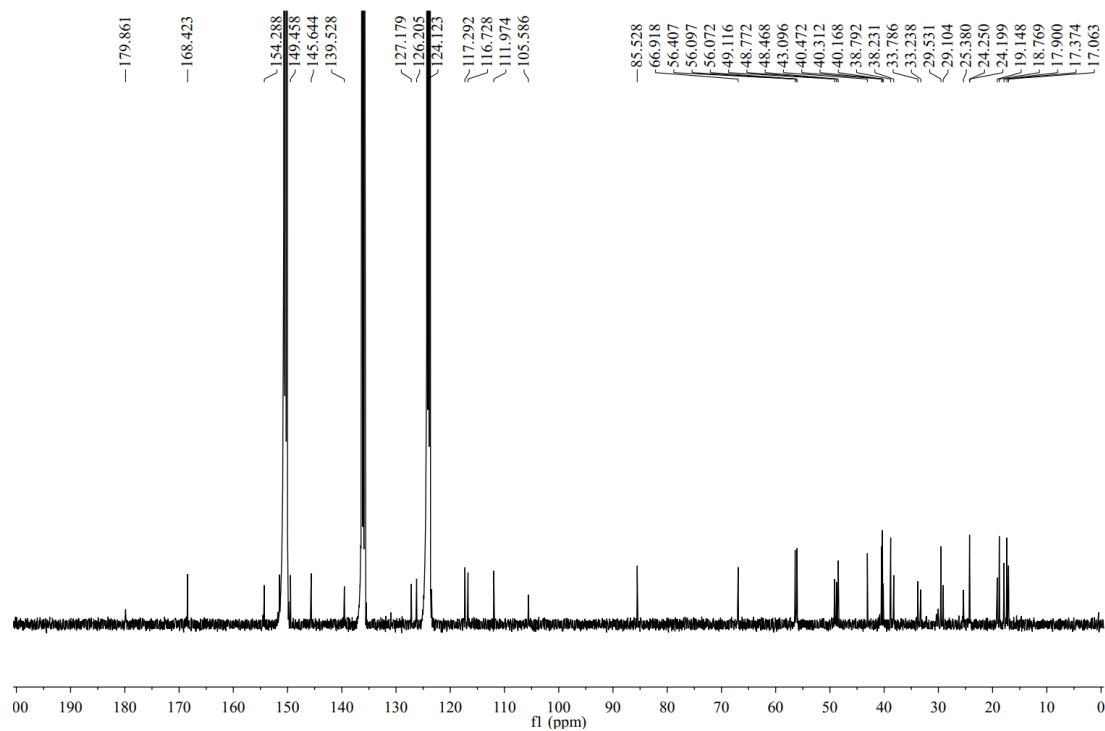

Figure S38. <sup>13</sup>C NMR spectrum of 5 (100 MHz, C<sub>5</sub>D<sub>5</sub>N)

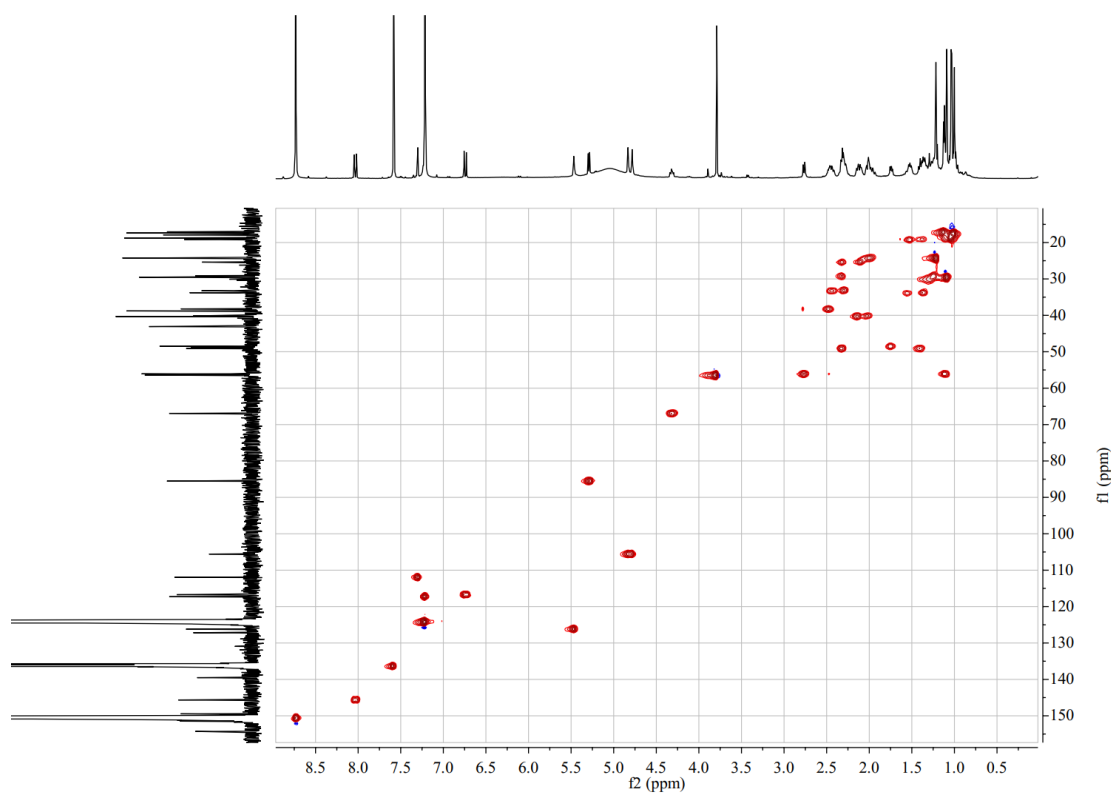

Figure S39. HSQC spectrum of 5 in C<sub>5</sub>D<sub>5</sub>N

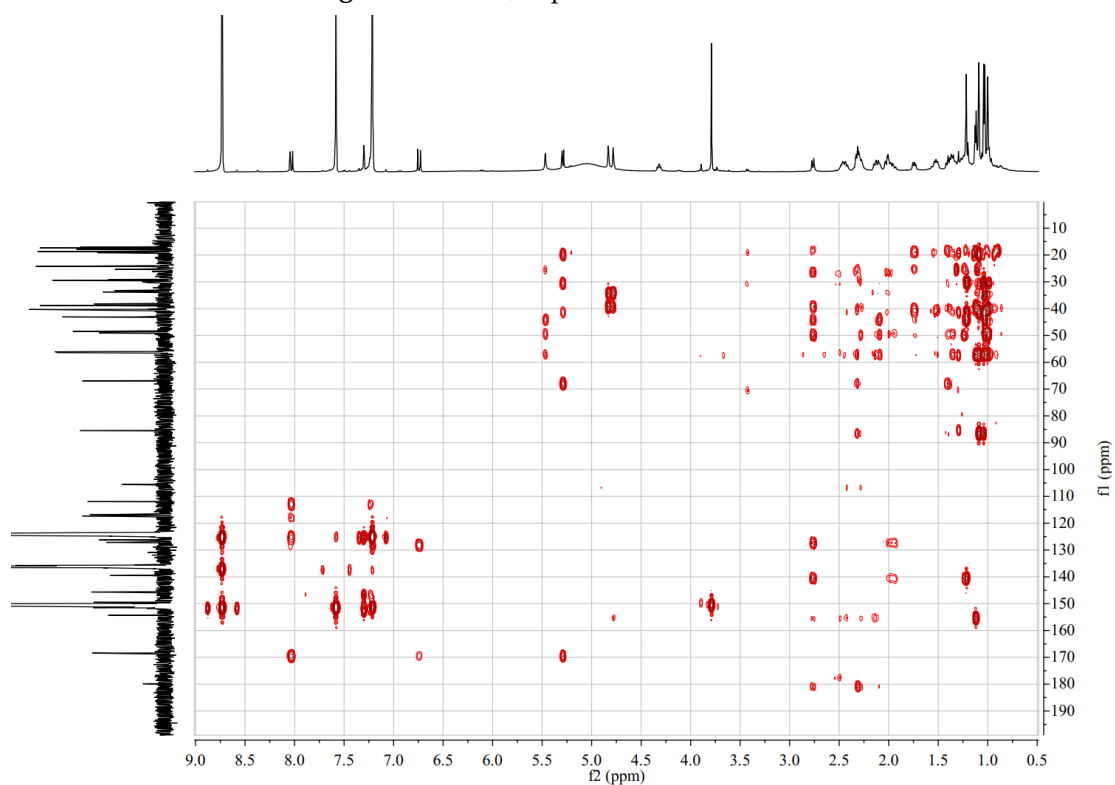

Figure S40. HMBC spectrum of 5 in C<sub>5</sub>D<sub>5</sub>N

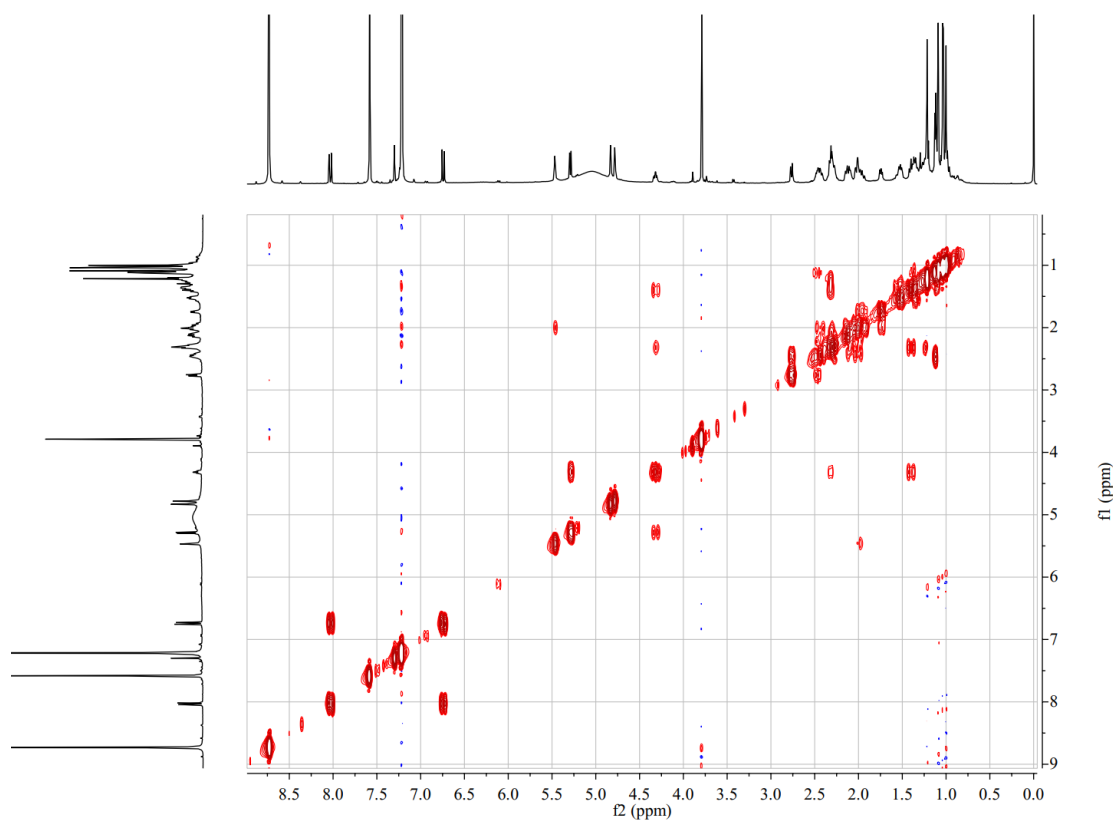

**Figure S41.**  $^1\text{H}$ - $^1\text{H}$  COSY spectrum of **5** in  $\text{C}_5\text{D}_5\text{N}$

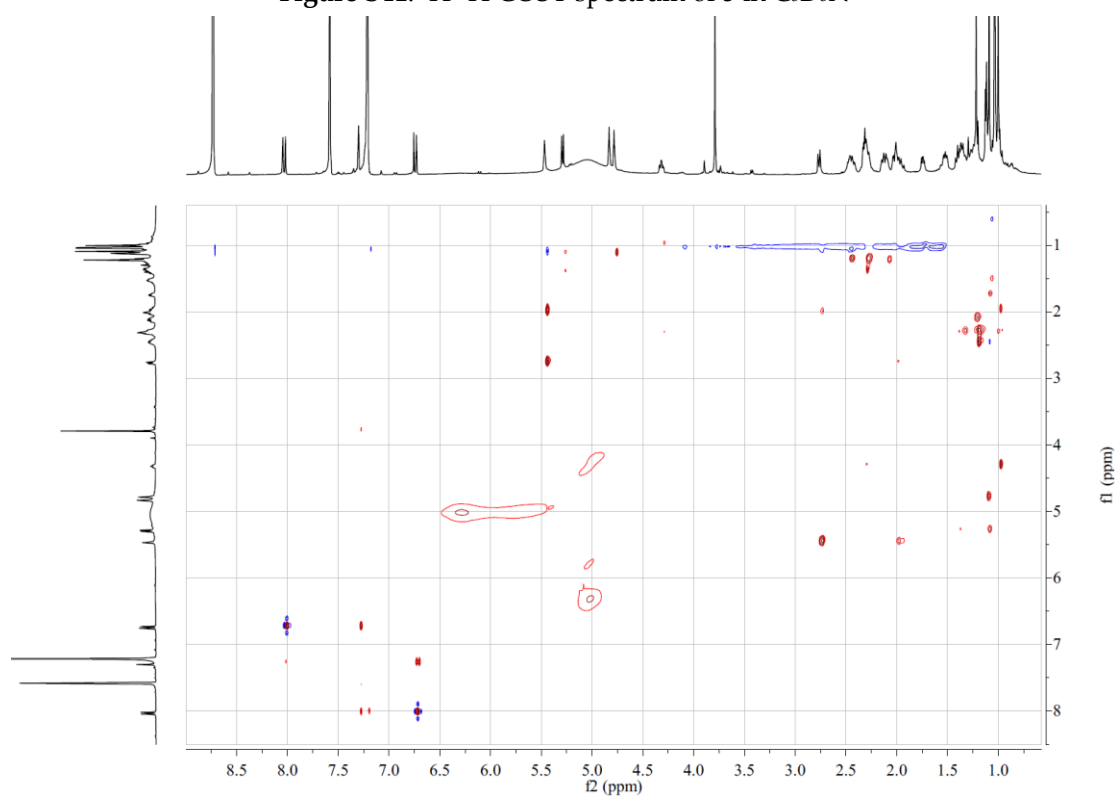

**Figure S42.** NOESY spectrum of **5** in  $\text{C}_5\text{D}_5\text{N}$

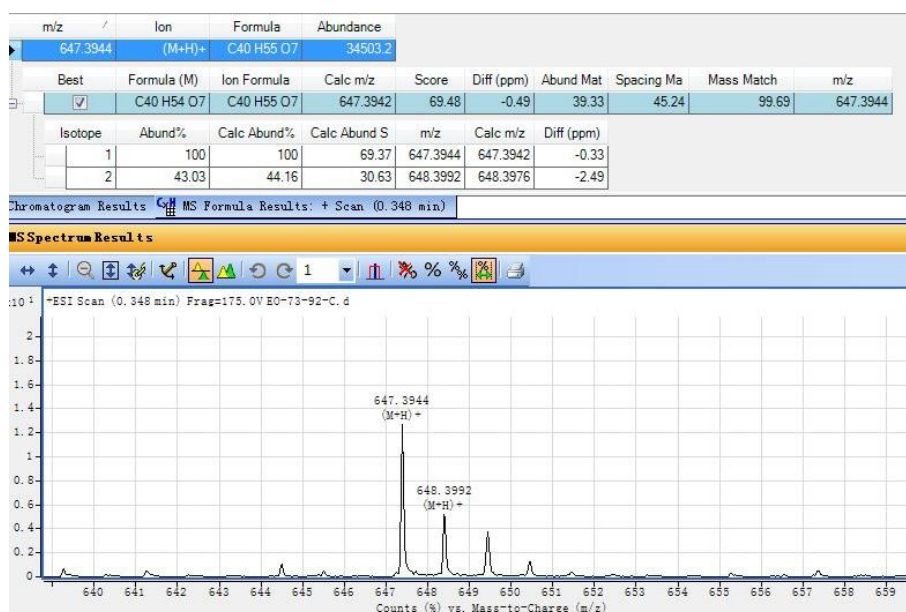

Figure S43. (+)-HRESIMS spectrum of **5**

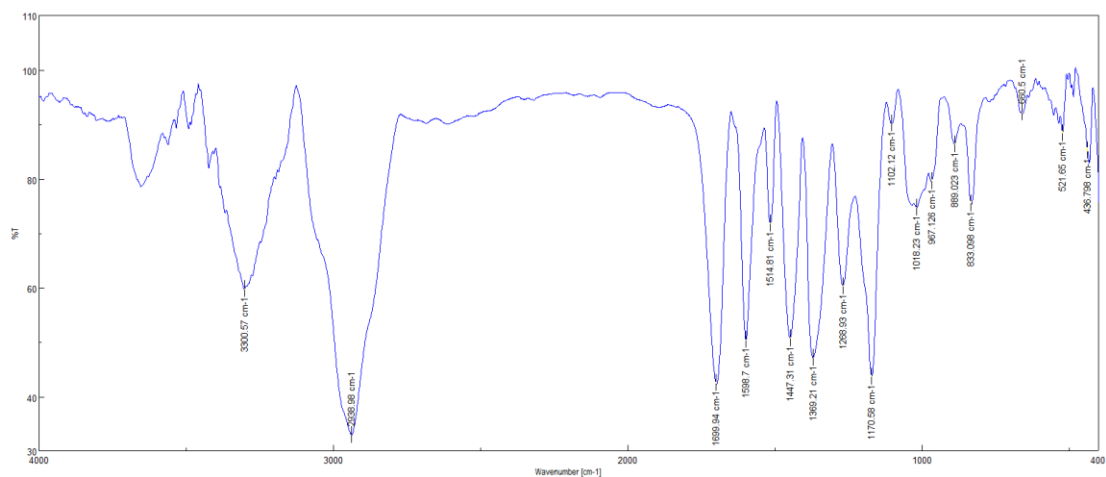

Figure S44. IR spectrum of **5**

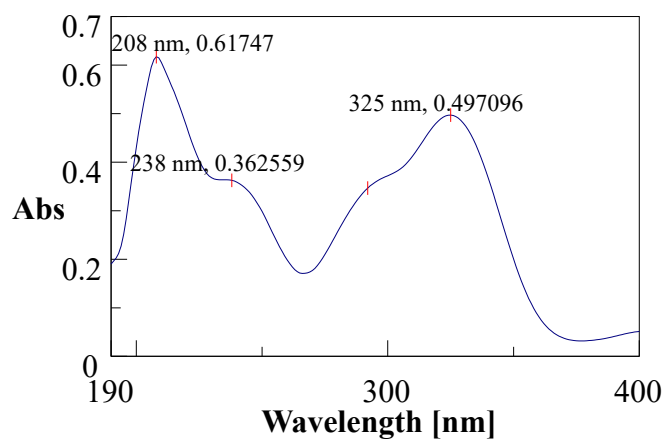

Figure S45. UV spectrum of **5**

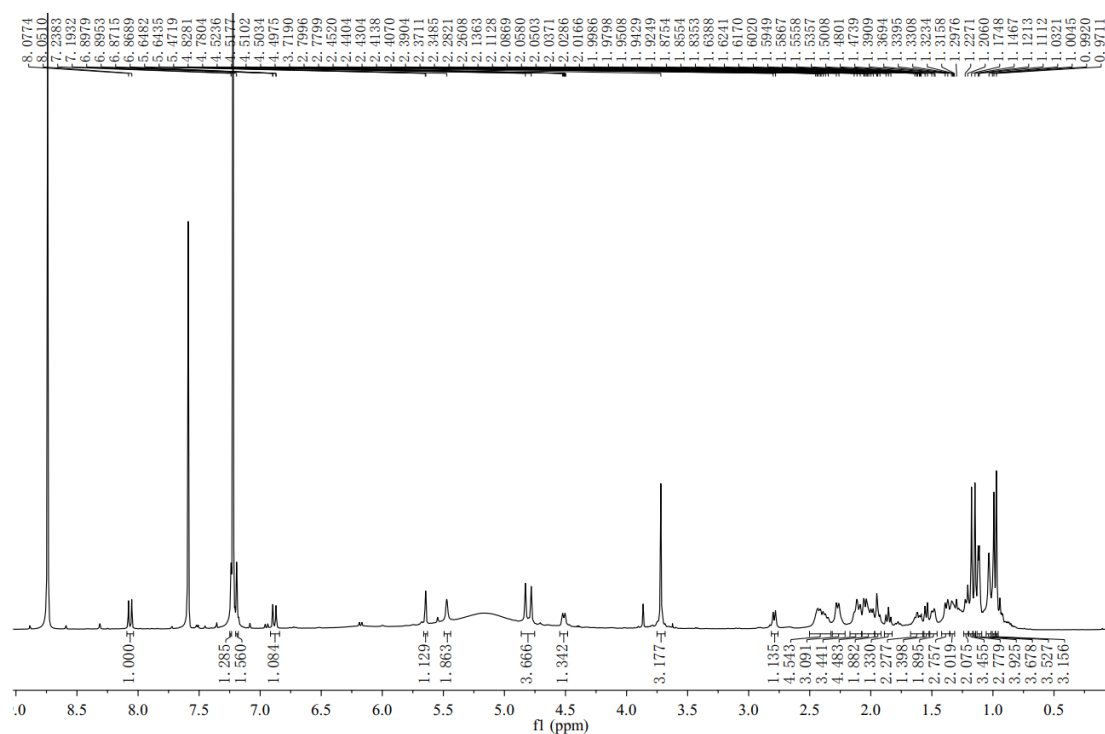

Figure S46. <sup>1</sup>H NMR spectrum of **6** (400 MHz, C<sub>5</sub>D<sub>5</sub>N)

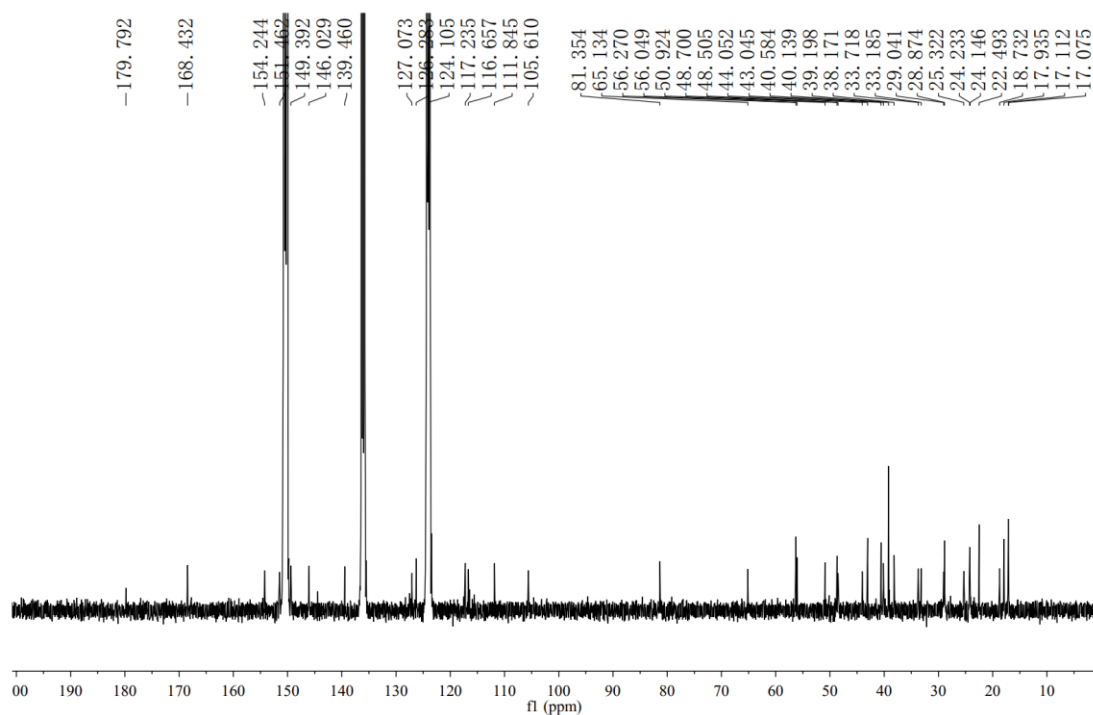

Figure S47. <sup>13</sup>C NMR spectrum of **6** (100 MHz, C<sub>5</sub>D<sub>5</sub>N)



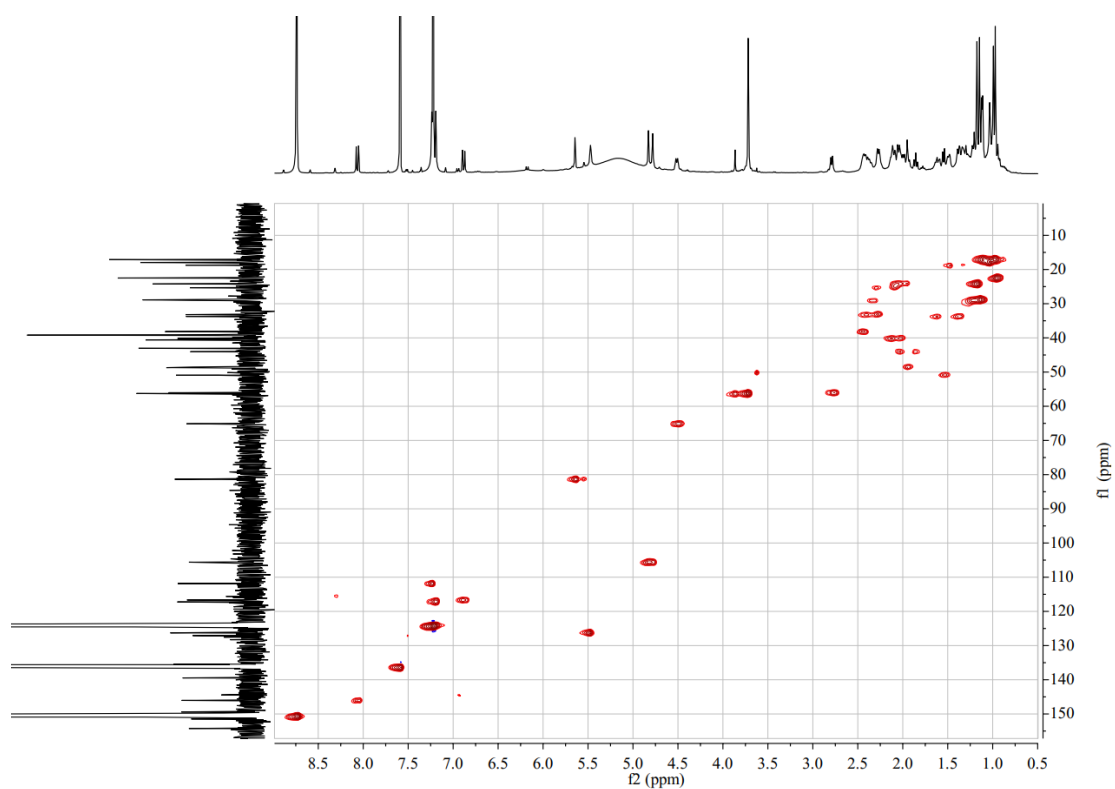

Figure S48. HSQC spectrum of **6** in  $\text{C}_5\text{D}_5\text{N}$

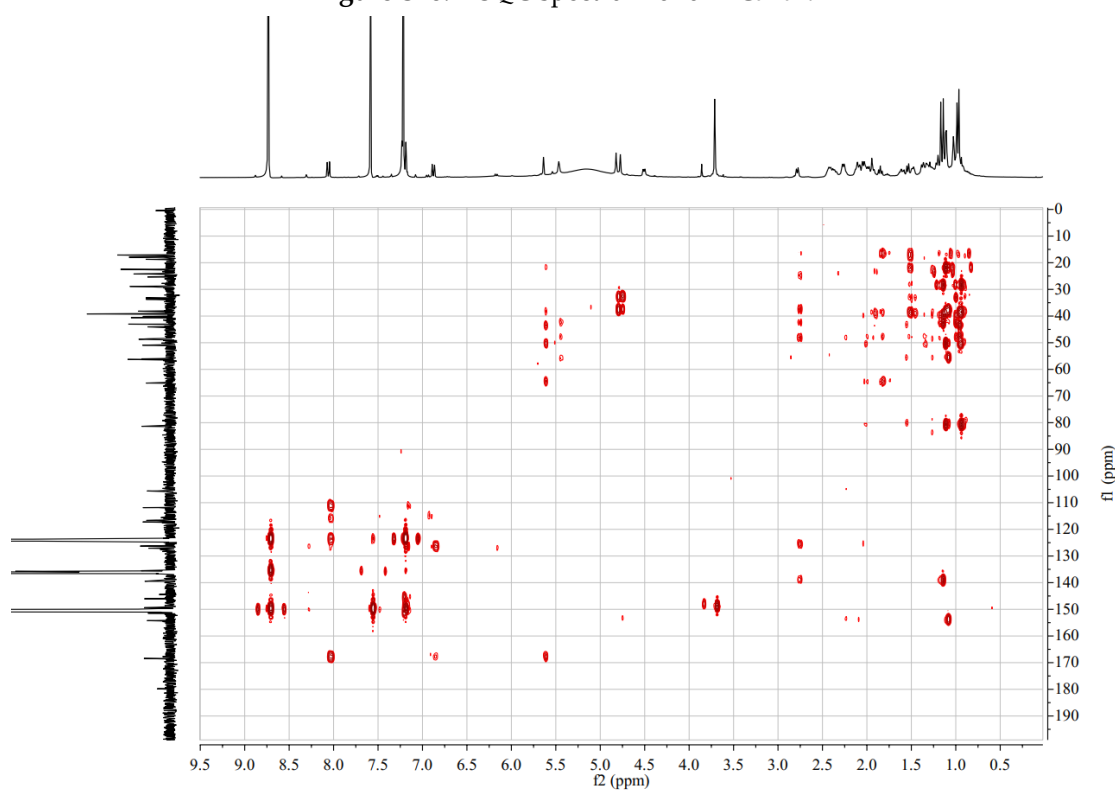

Figure S49. HMBC spectrum of **6** in  $\text{C}_5\text{D}_5\text{N}$

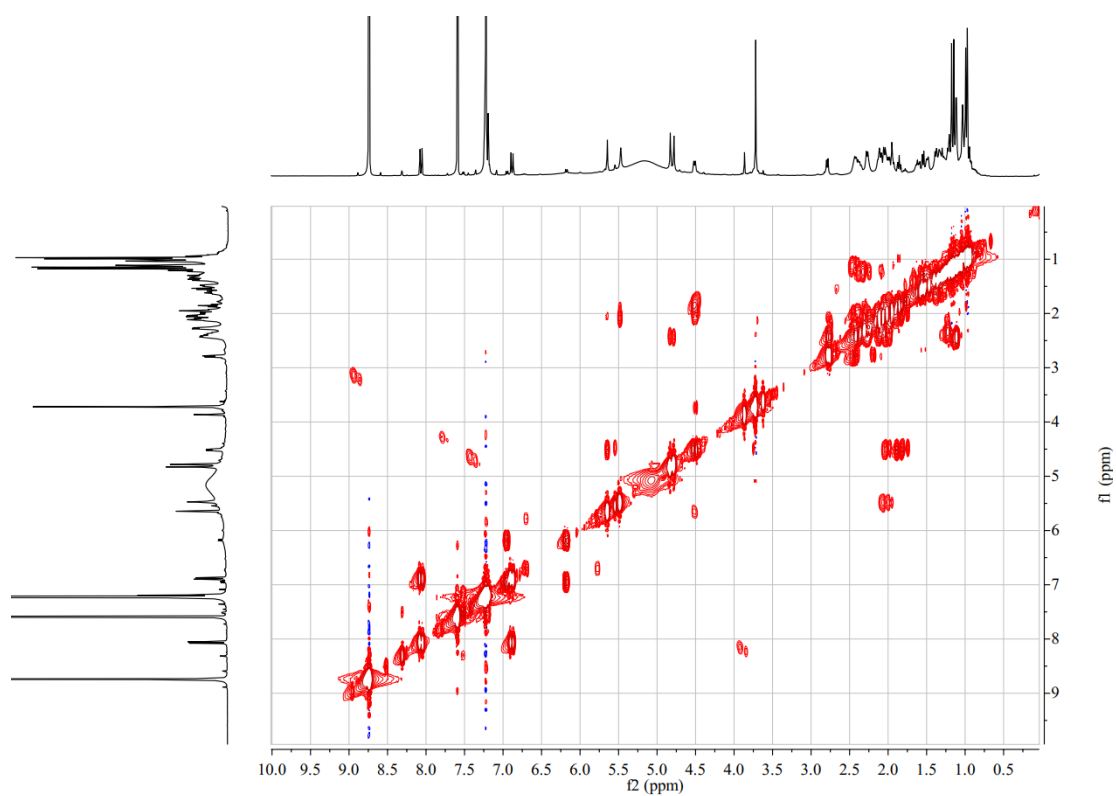

**Figure S50.**  $^1\text{H}$ - $^1\text{H}$  COSY spectrum of **6** in  $\text{C}_5\text{D}_5\text{N}$

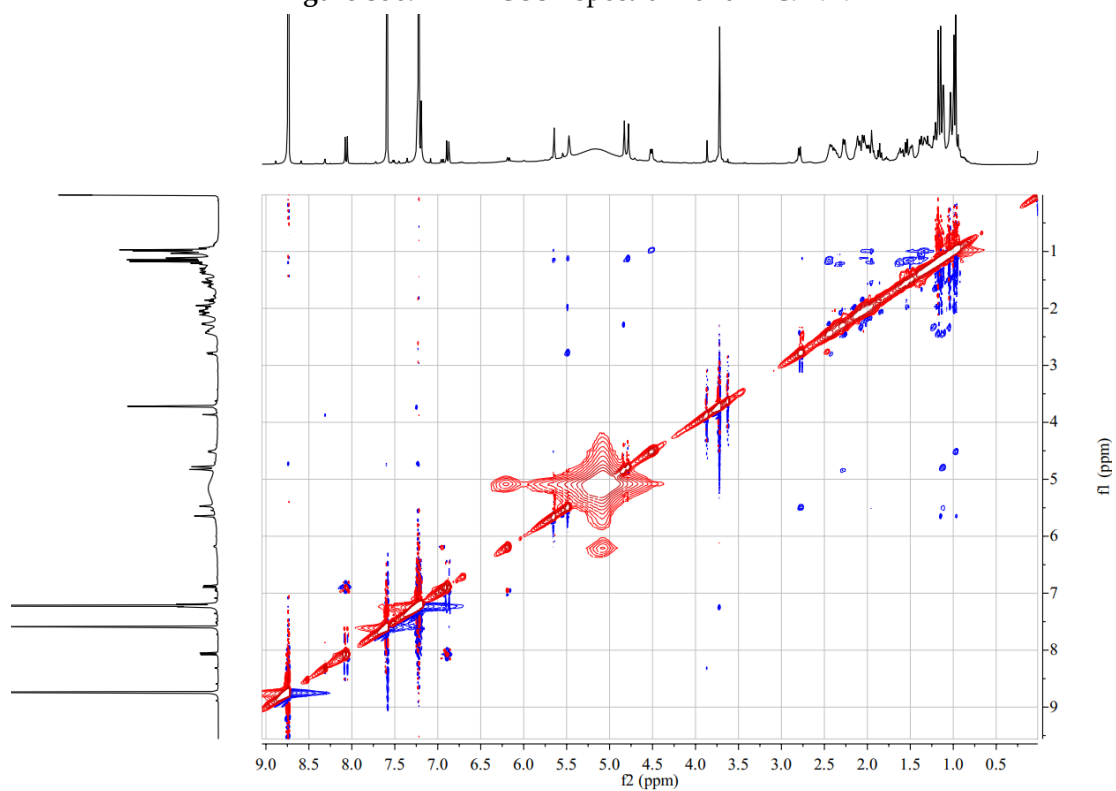

**Figure S51.** NOESY spectrum of **6** in  $\text{C}_5\text{D}_5\text{N}$

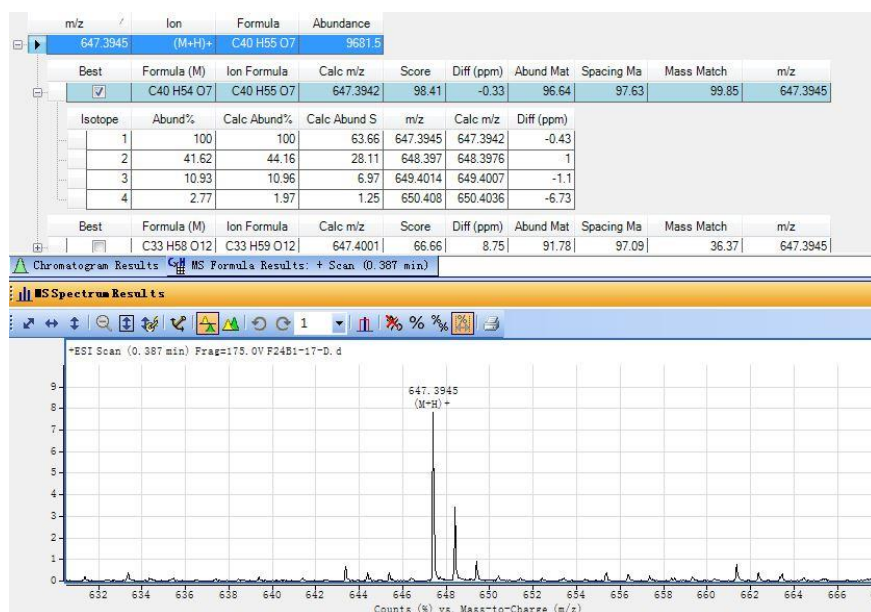

Figure S52. (+)-HRESIMS spectrum of 6

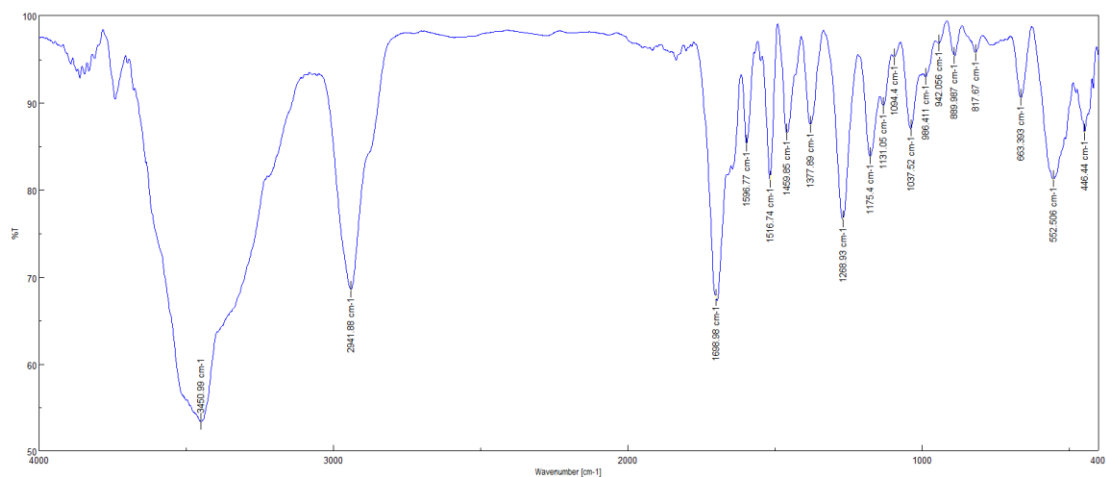

Figure S53. IR spectrum of 6

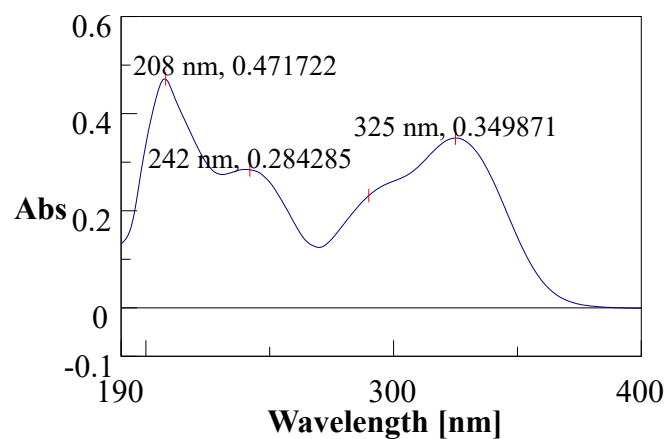

Figure S54. UV spectrum of 6
